# Supplementary material for: GPR133 (ADGRD1), an adhesion G-protein-coupled receptor, is necessary for glioblastoma growth
Source: PubMed Central journal article supplement (PMC5117849; doi:10.1038/oncsis.2016.63), 2016-10-24
Supplement: oncsis201663x1.pdf [file oncsis201663x1.pdf]

## Supplementary Figure and Table Legends

### Supplementary Figure 1. DNA methylation-based classification of parental

**tumors. a.** The parental tumors for 8/9 primary cultures used in this study were analyzed with 450k arrays for DNA methylation. Copy number variation (CNV) profiles are shown. **b.** Molecular subtype by DNA methylation and RNA-seq (where available), cytogenetic profile, important CNV information, IDH1 status and MGMT promoter methylation status are shown. NGS, next-generation sequencing.

### Supplementary Figure 2. GPR133 expression information. a.

Representative flow cytometry analysis of 3 primary GBM cultures for CD133 and GPR133. **b.** Summary statistics describing the abundance of GPR133+ and CD133+ cells in 3 primary cultures based on flow cytometric quantitation. **c.** Analysis of GTEx data on human tissue-specific expression of *GPR133*. Normal brain tissue expresses very low amounts of *GPR133*.

### Supplementary Figure 3. Expression pattern of GPR133 in human GBM

**biospecimens and tumor xenografts. a.** GPR133 immunoreactivity in hypoxic PPN regions of adjacent sections of an FFPE human GBM biospecimen, as detected with a

rabbit polyclonal (i) and a mouse monoclonal (ii) antibody. In (i), GPR133 expression overlaps with CD133 expression (arrowheads). In (ii), GPR133 and CA9 co-localize in PPN cells (arrowheads). **bi-iii.** GPR133 immunoreactivity co-localizes with pimonidazole in tumor xenografts in the mouse brain (n=3 animals). Evans Blue highlights the vasculature, which is relatively scant in the more hypoxic portion of the tumor staining positive for pimonidazole. The region of interest in (ii) is shown in high magnification in (iii), where several cells with overlapping GPR133 and pimonidazole staining are observed (arrowheads). N: necrosis; PPN: pseudopalisading necrosis.

**Supplementary Figure 4. Characterization of a new mouse monoclonal anti-**

**GPR133 antibody.** **a.** The antibody recognizes the pentraxin/concanavalin A domain of GPR133's N-terminal ectodomain. **b.** CHO-GPR133 and mock-transfected cells (CHO-Mock) were subjected to qRT-PCR analysis for *GPR133* mRNA with and without doxycycline (1  $\mu$ g/ml). **c.** In a quality control assay, CHO-Mock cells were immunostained with the anti-GPR133 mouse monoclonal antibody with and without doxycycline. Both permeabilized (i) and non-permeabilized (ii) preparations were used.

We did not observe any GPR133 immunostaining.

**Supplementary Figure 5. Quantitation of *GPR133* mRNA with two different Taqman assays and the distribution of reads obtained with RNA-seq reveal that full-length *GPR133* is the predominant isoform in GBM.** **a.** The relative amounts of *GPR133* mRNA detected with two different Taqman assays did not differ, suggesting that the full-length *GPR133* splice variant is the dominant one in 5 primary GBM cultures (n=3 replicates/condition; t-test for each culture, P>0.05 throughout). **b.** Sashimi plots showing the distribution of reads obtained from RNA-seq comparison of FACS-isolated CD133+ and CD133- cells from GBML8 sample (average of 2 RNA-seq experiments shown). Reads were aligned with predicted *Ensembl* transcripts to show exon usage.

**Supplementary Figure 6. *In vitro* effects of *GPR133* knockdown in GBML8.** The layout of this figure is identical to **Figure 4**, but describes data obtained with GBML8. **a.** **i.** Representative example of the effect of *GPR133* knockdown (*GPR133*-KD#1) on the number of *GPR133*+ cells, as shown by flow cytometry. **ii.** Cumulative statistics on the reduction of *GPR133*+ cells by *GPR133* knockdown (n=3 experiments, t-test, P<0.003). **b.** *GPR133* knockdown decreases *GPR133* mRNA levels (n=3 experiments, t-test, P<0.0001). **c.** Flow cytometry indicates reduction in the abundance of CD133+ cells

after GPR133 knockdown. A representative example (i) and cumulative statistics (ii) (n=3 experiments, t-test,  $P < 0.0005$ ) are shown. **d,e.** Knockdown of GPR133 reduces the percentage of Ki67+ cells in both normoxia (n=3 experiments, t-test,  $P < 0.02$ ) and hypoxia (n=3 experiments, t-test,  $P < 0.05$ ). **e.** GPR133 knockdown impairs tumorsphere formation in (i) normoxia (n=3 experiments, t-test,  $P < 0.002$ ) and (ii) hypoxia (n=3 experiments, t-test,  $P < 0.002$ ).

**Supplementary Figure 7. *In vitro* effects of GPR133 knockdown on cell proliferation.** We tested the effects of GPR133 knockdown (GPR133-KD#1) on cell proliferation using immunostaining for phospho-H3 (pH3) in GBML8 (**a**) and GBML20 (**b**) cells *in vitro*. Representative images are shown in (**ai**) and (**bi**). Summary statistics in (**aii**) and (**bii**) indicate that GPR133 knockdown produces a significant reduction in pH3 staining, indicating reduced tumor cell proliferation (GBML8: n=3 experiments, t-test,  $P < 0.001$ ; GBML20: n=3 experiments, t-test,  $P < 0.0001$ ).

**Supplementary Figure 8. Effects of GPR133 knockdown on limiting dilution assays and sphere size in GBML8 and GBML20.** **a,b.** Dissociated GBML8 (**a**) and GBML20 (**b**) cells bearing either scrambled or GPR133-KD#1 constructs were plated in

limiting dilutions (1,10,100 and 1000 cells/well) and allowed to form spheres in either (i) normoxia or (ii) hypoxia. GPR133-KD in all conditions led to a significant reduction in the probability of sphere formation, indicating a reduction in stem cell frequency ( $P < 0.0001$ ). Along these lines, the number of spheres formed/well was significantly lower in (i) normoxia (GBML8: ANOVA  $F_{(1,12)} = 47.68$ ,  $P < 0.0001$ ; and GBML20: ANOVA  $F_{(1,12)} = 84.55$ ,  $P < 0.0001$ ) and (ii) hypoxia (GBML8: ANOVA  $F_{(1,12)} = 40.59$ ,  $P < 0.0001$ ; and GBML20: ANOVA  $F_{(1,12)} = 44.57$ ,  $P < 0.0001$ ). P values for *post hoc* multiple comparisons by Tukey's test are shown in the figure ( $n = 5$  wells/condition). **c.** Analysis of the size of the spheres formed using (i) GBML8 and (ii). GBML20 cells did not reveal any significant difference.

**Supplementary Table 1. a.** Genes upregulated in CD133+ vs. CD133- GBM cells. **b.** Genes downregulated in CD133+ vs. CD133- GBM cells.

**Supplementary Table 2. a.** Taqman Assays, **b.** PCR primers and **c.** shRNA constructs used in the study.

**Supplementary Table 3.** Antibodies used for immunofluorescence staining.

**a**

Copy number profiles

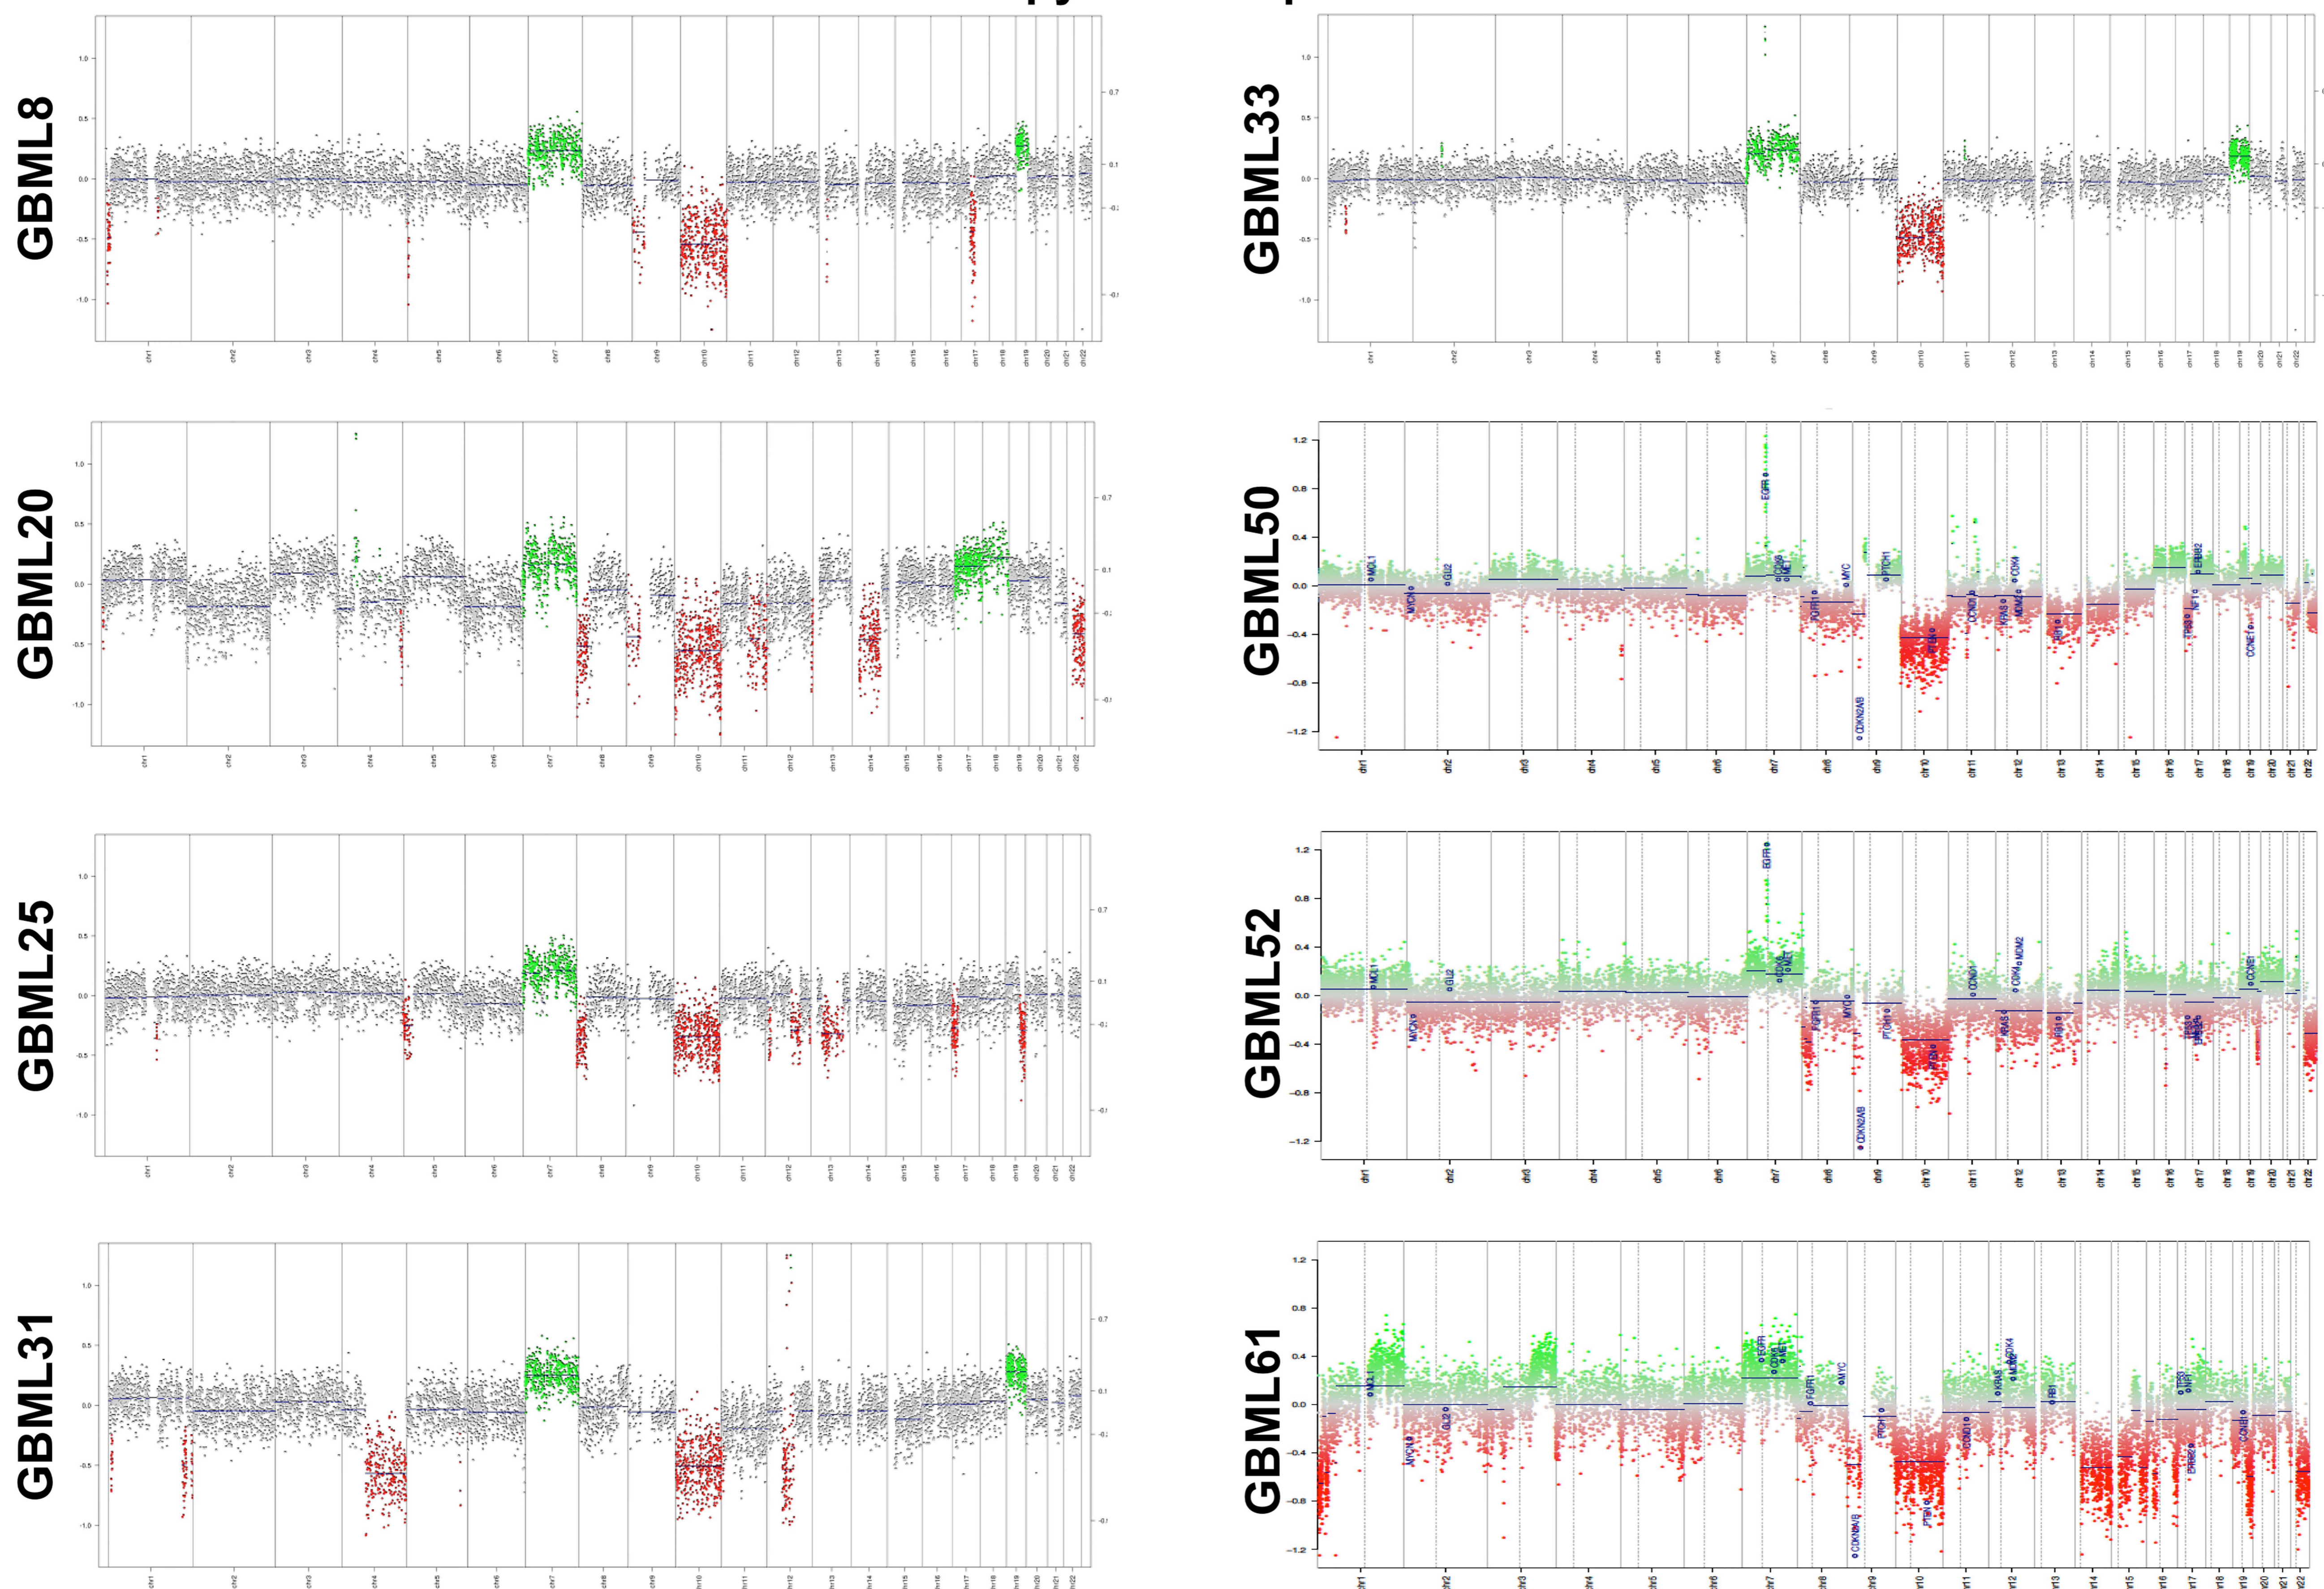

Chr 1-22 →

Chr 1-22 →

**b**

| Patient sample | Score/subtype by DNA Methylation array | Score/subtype by RNA-seq | Cytogenetics                                 | Other implied changes from CNV or NGS analysis      | IDH1 status   | MGMT methylation |
|----------------|----------------------------------------|--------------------------|----------------------------------------------|-----------------------------------------------------|---------------|------------------|
| GBML8          | Mesenchymal                            | Mesenchymal              | 7+, 9p-, 10-, 17q-, 19p+                     | CDKN2A loss, PTEN loss, Nf1 loss                    | IDH wild-type | Methylated       |
| GBML20         | GBM RTK1 (proneural)                   | Proneural                | 7+, 8p-, 10-, 11q-, 14-, 17+                 | PDGFRA amp, PTEN loss                               | IDH wild-type | Not methylated   |
| GBML25         | GBM Classic/Mesenchymal & GBM RTK1     | Not available            | 4q-, 7+, 10-, 12q-, 12q+, 19+                | PTEN loss, MDM2 amp                                 | IDH wild-type | Not methylated   |
| GBML31         | GBM Classic                            | Not available            | 7+, 10-, 19+                                 | EGFR amp, PTEN loss                                 | IDH wild-type | Methylated       |
| GBML33         | GBM RTK1 (proneural)                   | Not available            | 5p-, 7+, 8p-, 10-, 12q-, 13q-, 17p-, 19q-    | TERT loss, PTEN loss, Rb1 loss, TP53 loss           | IDH wild-type | Not methylated   |
| GBML50         | GBM RTK1 (proneural)                   | Not available            | 10-                                          | EGFR amp, CDKN2A loss                               | IDH wild-type | Not methylated   |
| GBML52         | GBM Classic/Mesenchymal                | Classic                  | 7+, 8p-, 10-, 19q-, 22-                      | EGFR amp, CDKN2A loss, TP53 mutation, PTEN mutation | IDH wild-type | Not methylated   |
| GBML61         | GBM RTK1 (proneural)                   | Not available            | 1p-, 3q+, 7+, 9p-, 10-, 14-, 15q-, 19q-, 22- | CDKN2A loss, PTEN loss                              | IDH wild-type | Not methylated   |
| GBML62         | Not available                          | Not available            | Not available                                | TP53 mutation, Rb1 mutation                         | IDH wild-type | Not methylated   |

# Supplementary Figure 2

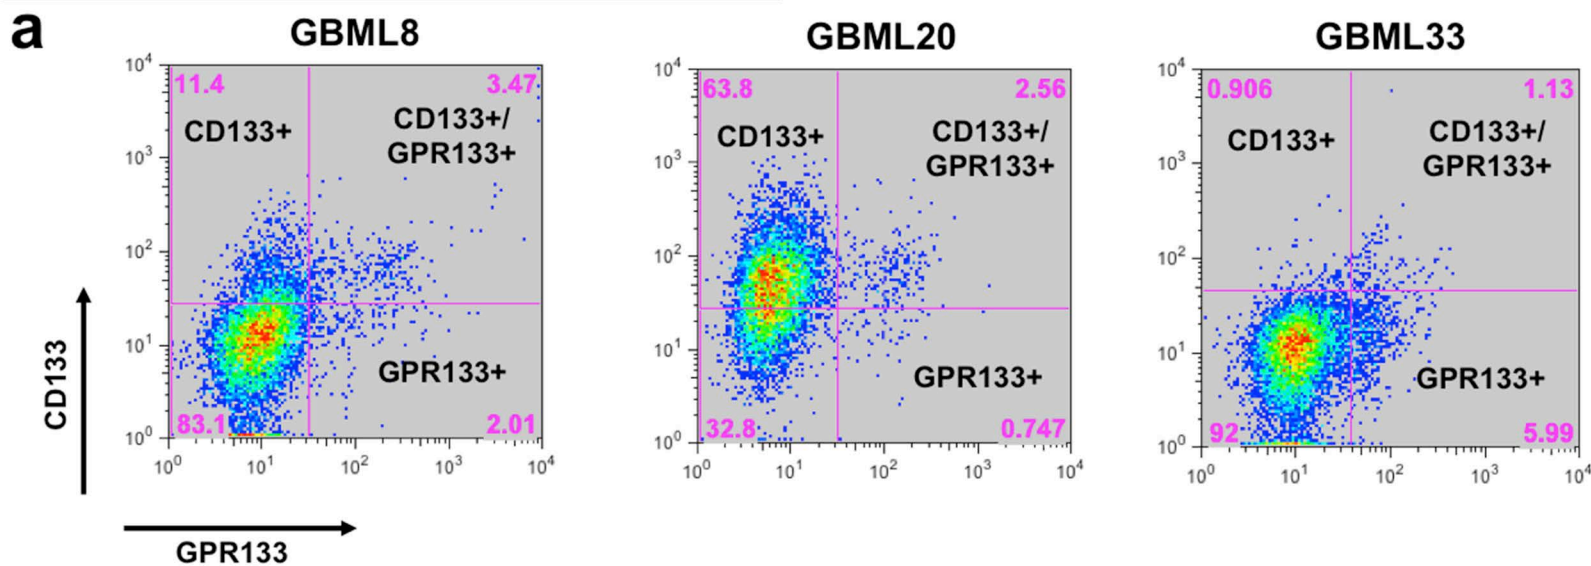

**b**

|                                 | % CD133+ cells       | % GPR133+ cells    | % GPR133+ cells in CD133+ population | % GPR133+ cells in CD133- population |
|---------------------------------|----------------------|--------------------|--------------------------------------|--------------------------------------|
| GBML8                           | 31.29 ± 16.00        | 2.95 ± 1.27        | 16.05 ± 4.78                         | 1.79 ± 0.29                          |
| GBML20                          | 71.13 ± 6.22         | 4.62 ± 0.86        | 4.92 ± 1.33                          | 3.56 ± 1.09                          |
| GBML33                          | 3.90 ± 2.51          | 9.39 ± 1.56        | 44.32 ± 13.32                        | 6.84 ± 2.13                          |
| <b>Cumulative (n=3 samples)</b> | <b>35.44 ± 19.52</b> | <b>5.65 ± 1.92</b> | <b>21.77 ± 11.72</b>                 | <b>4.06 ± 1.48</b>                   |

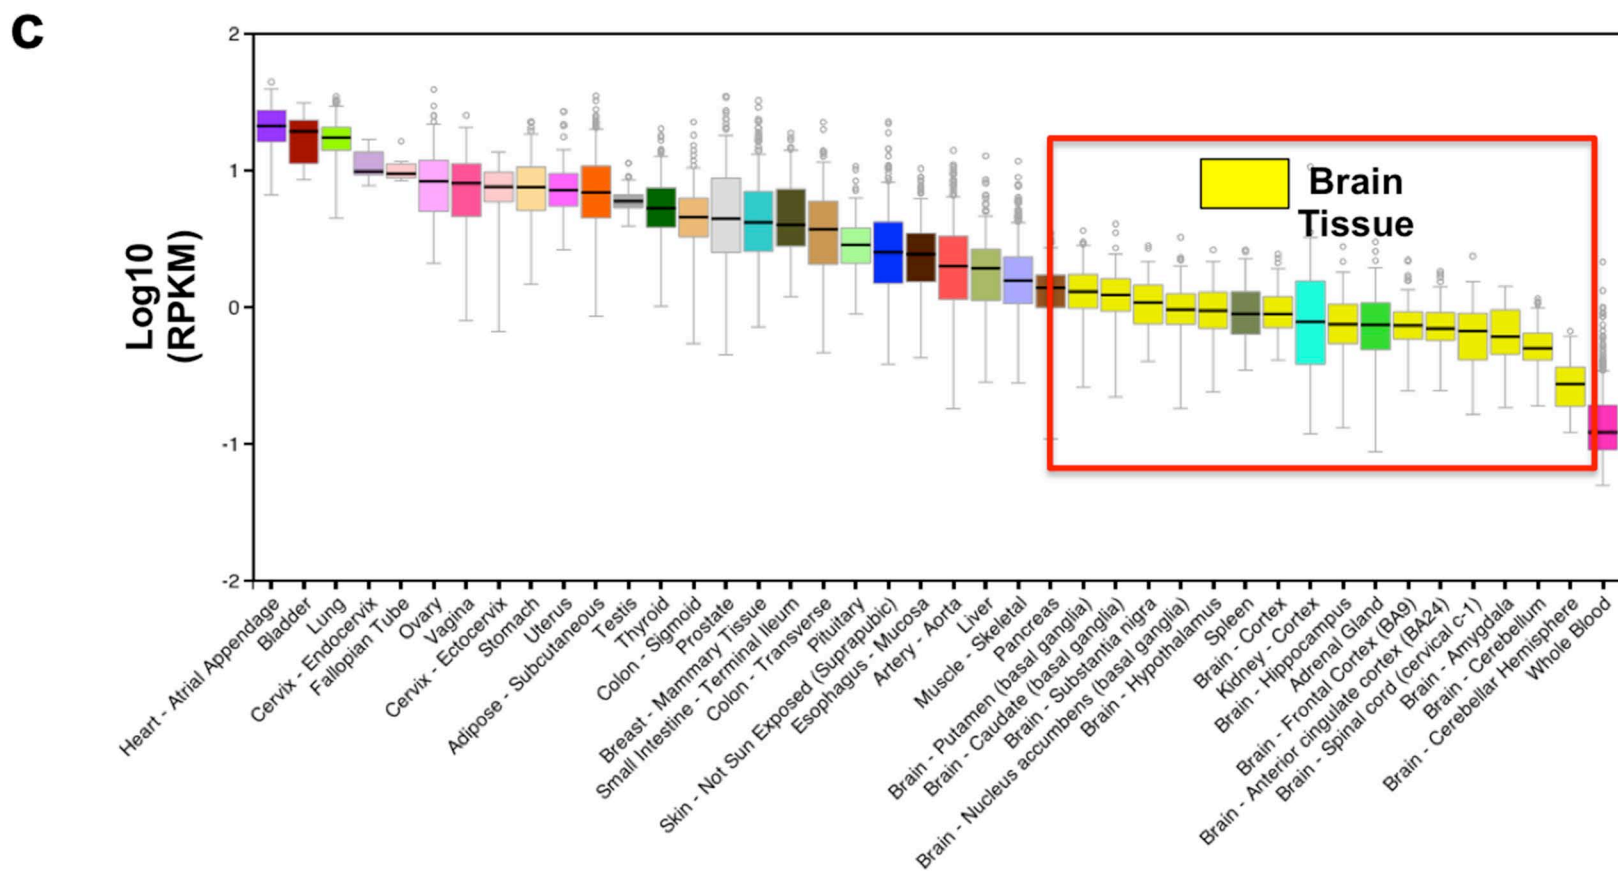

# Supplementary Figure 3

**a** GPR133 (rabbit Ab)/CD133/DAPI

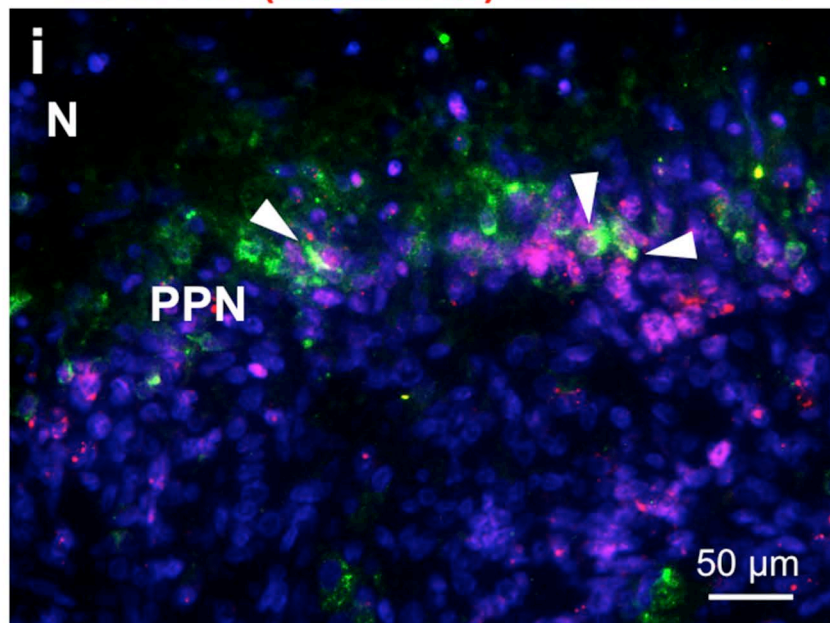

GPR133 (mouse Ab)/CA9/DAPI

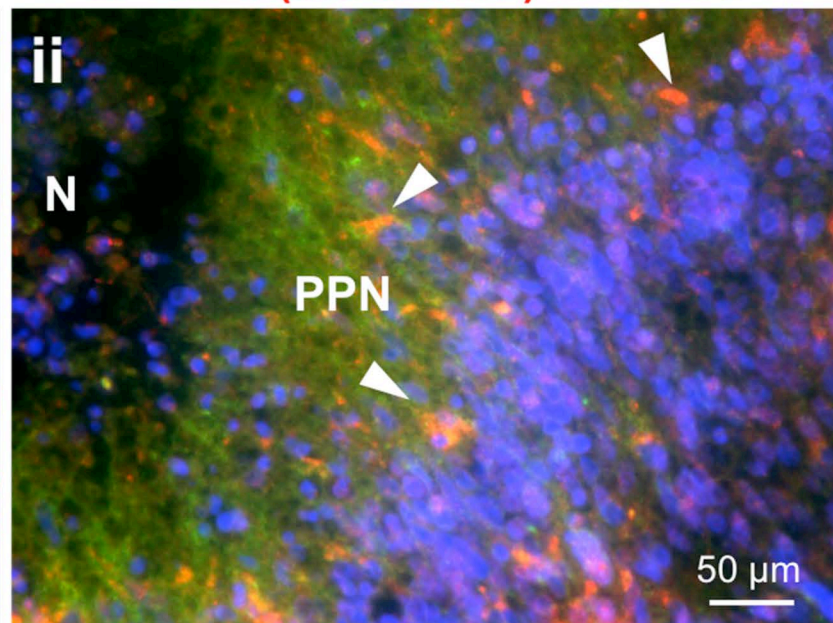

**b** pimonidazole/GPR133 (rabbit Ab)/EvansBlue/DAPI

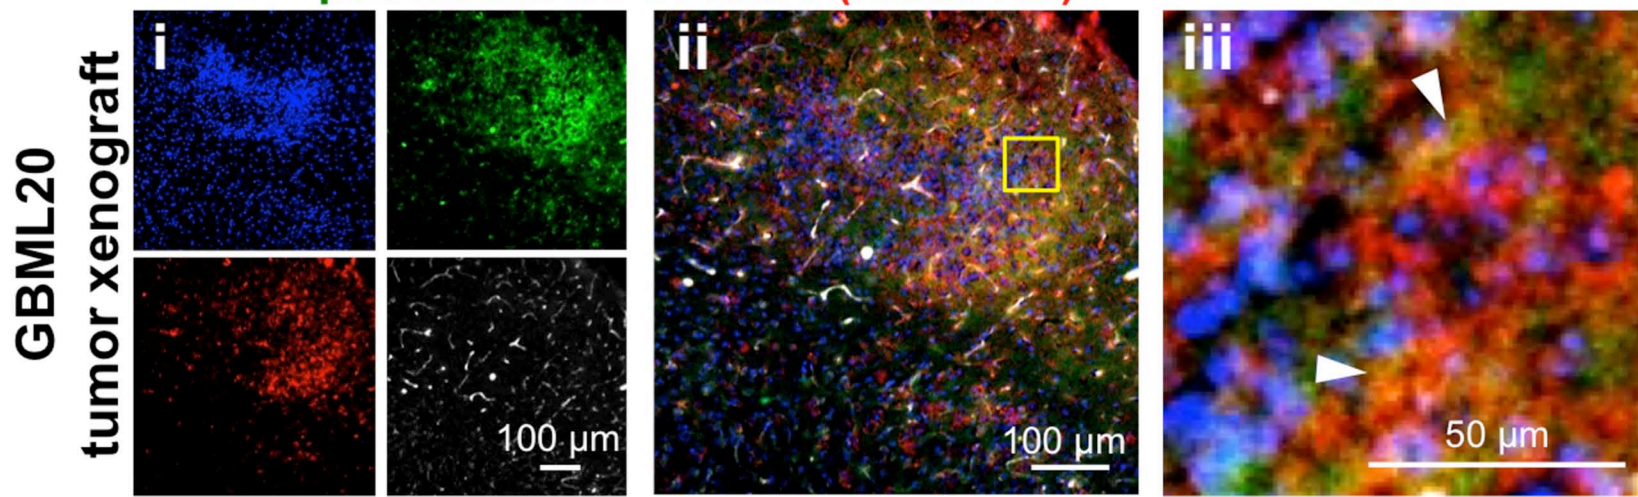



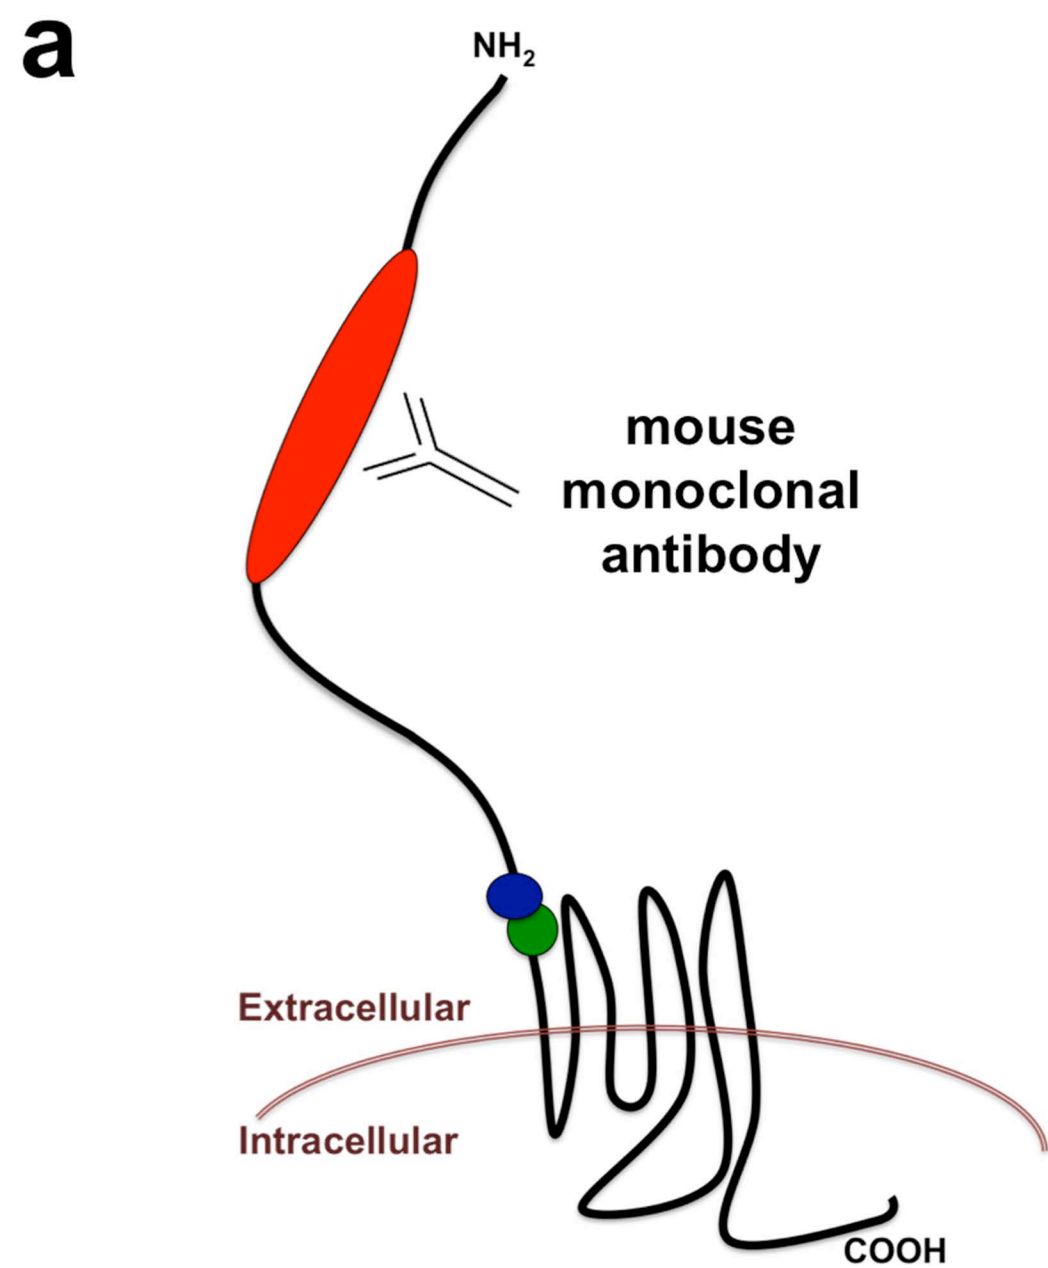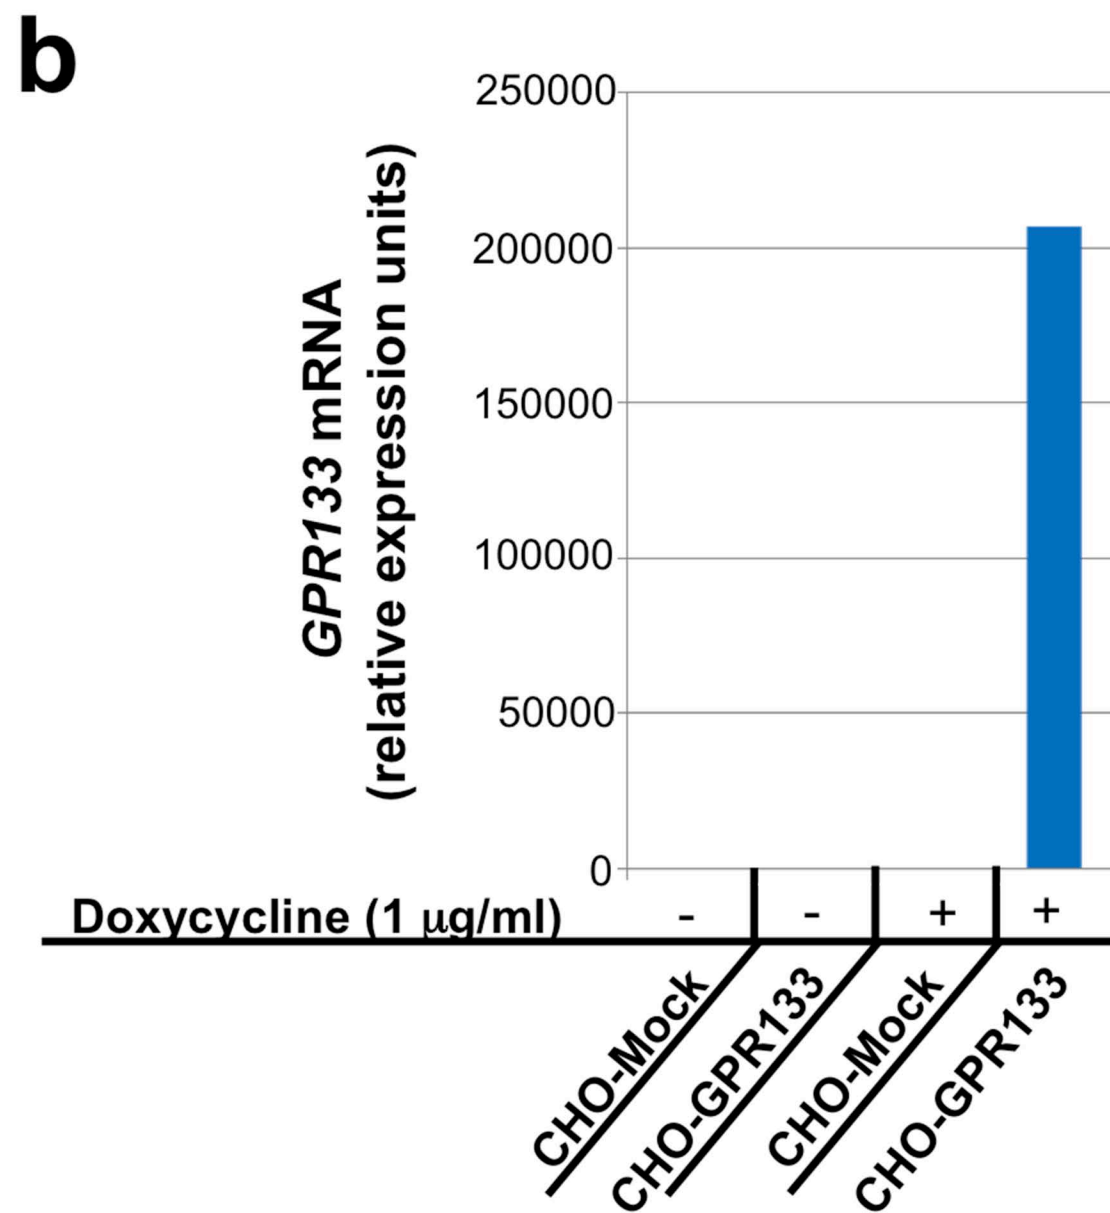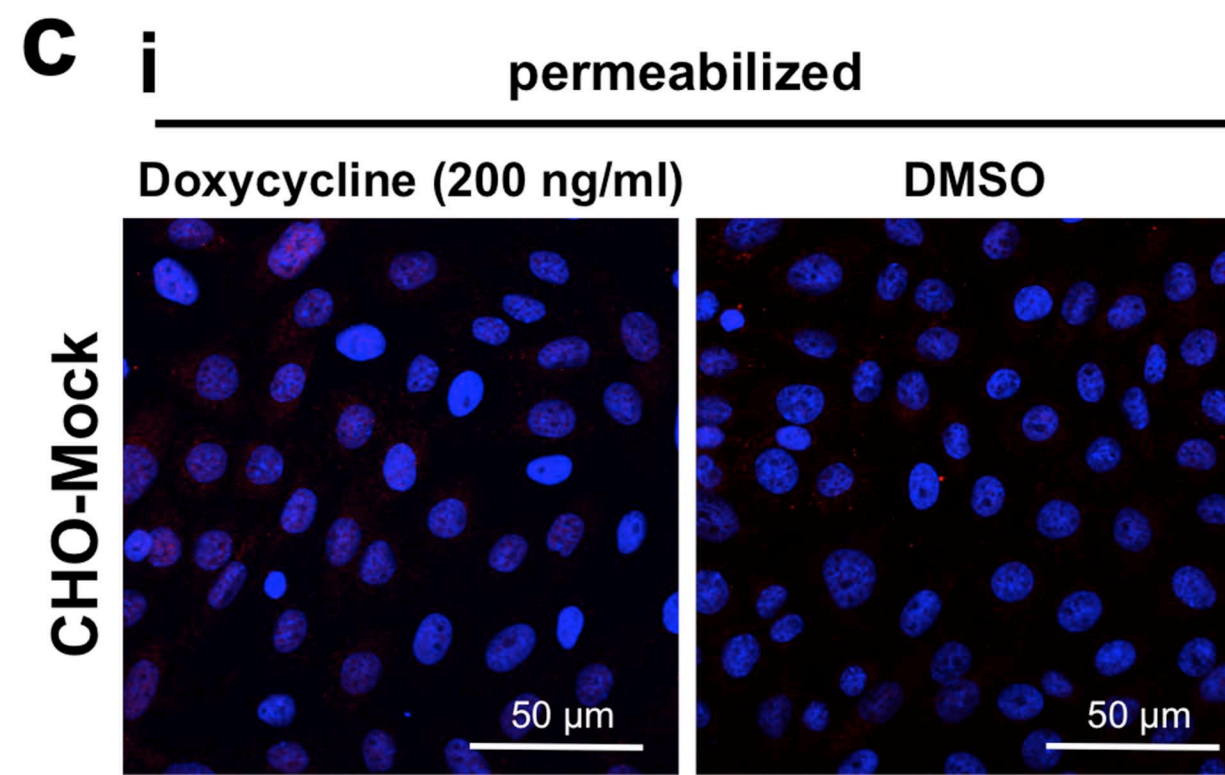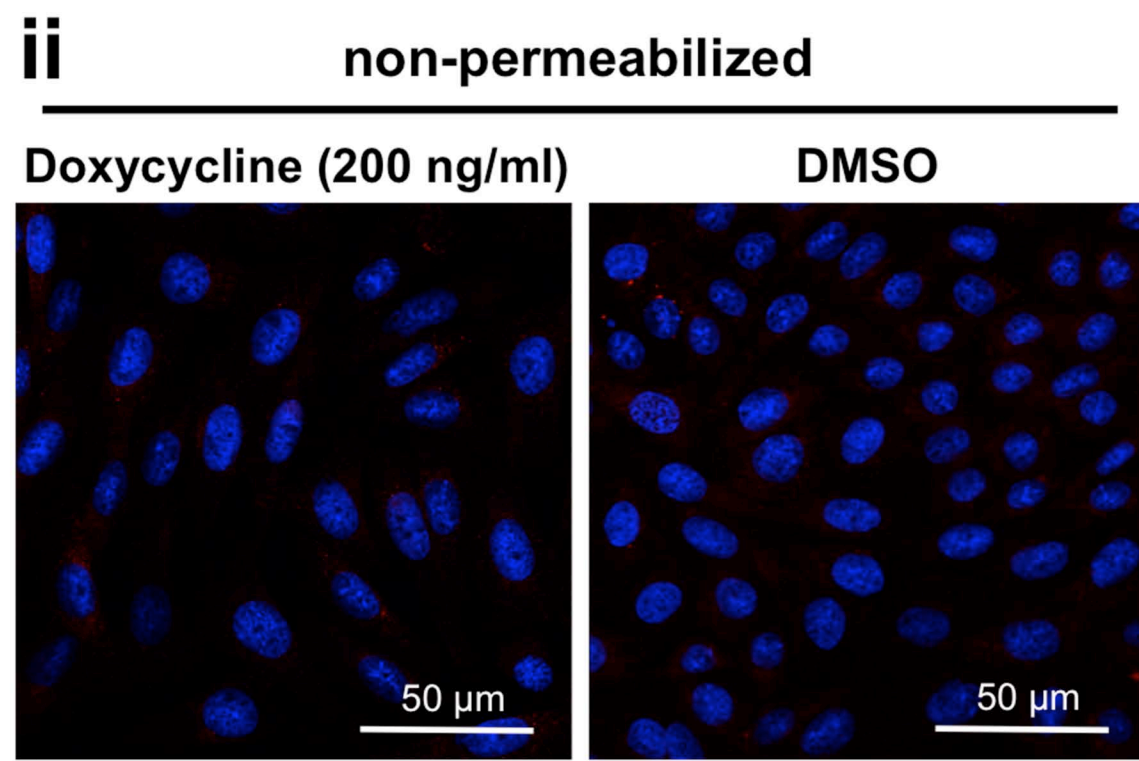

# Supplementary Figure 5

**a**

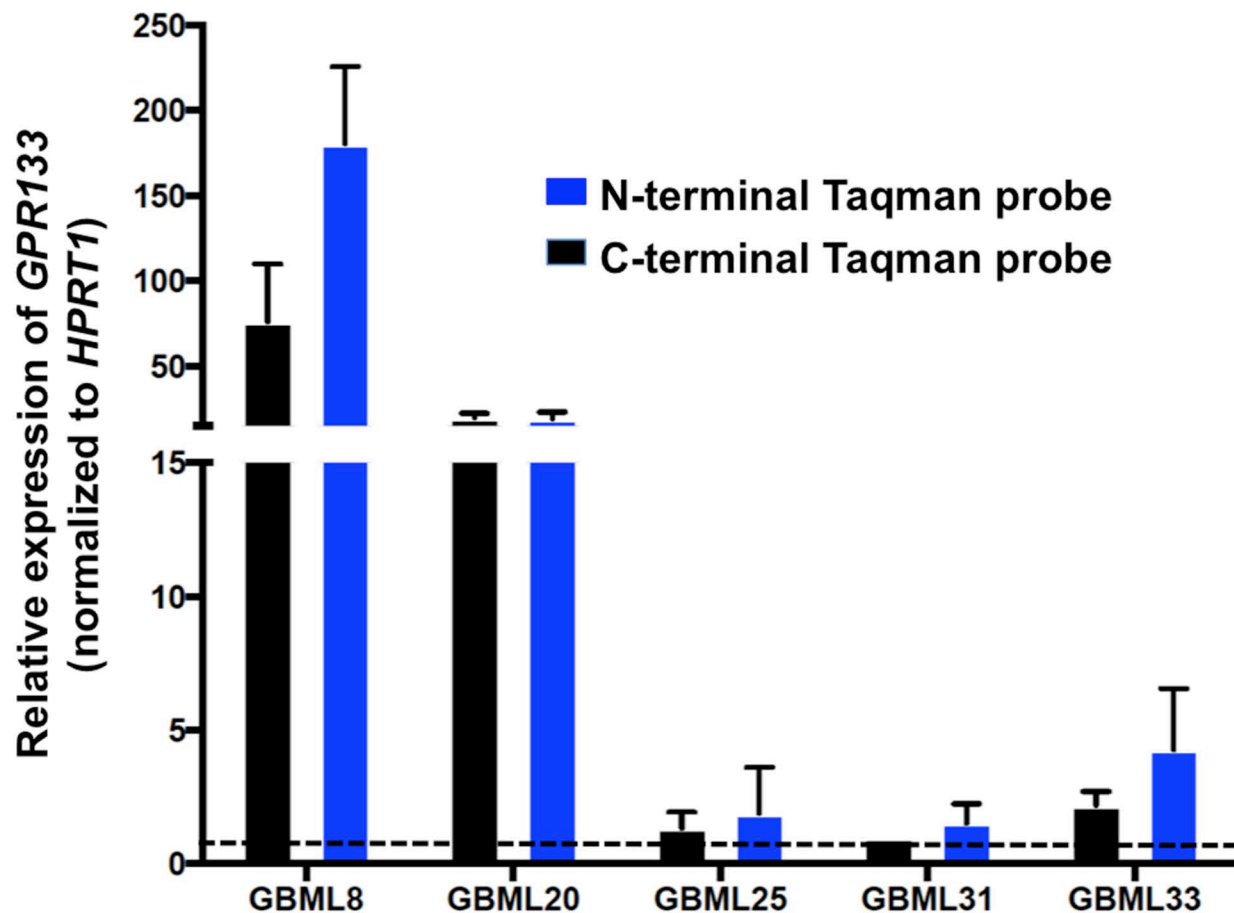

**b**

*GPR133* locus

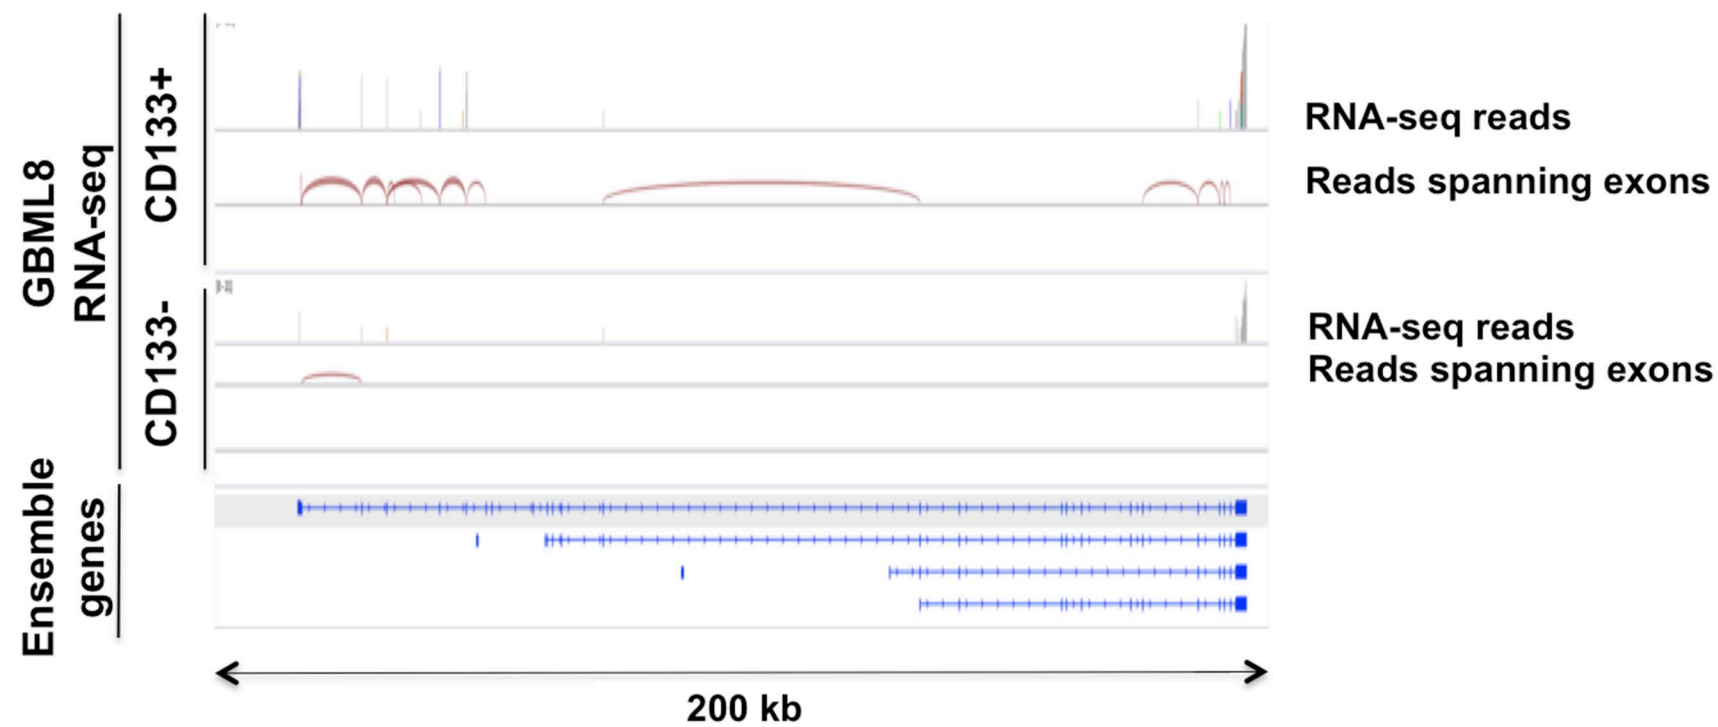

# Supplementary Figure 6

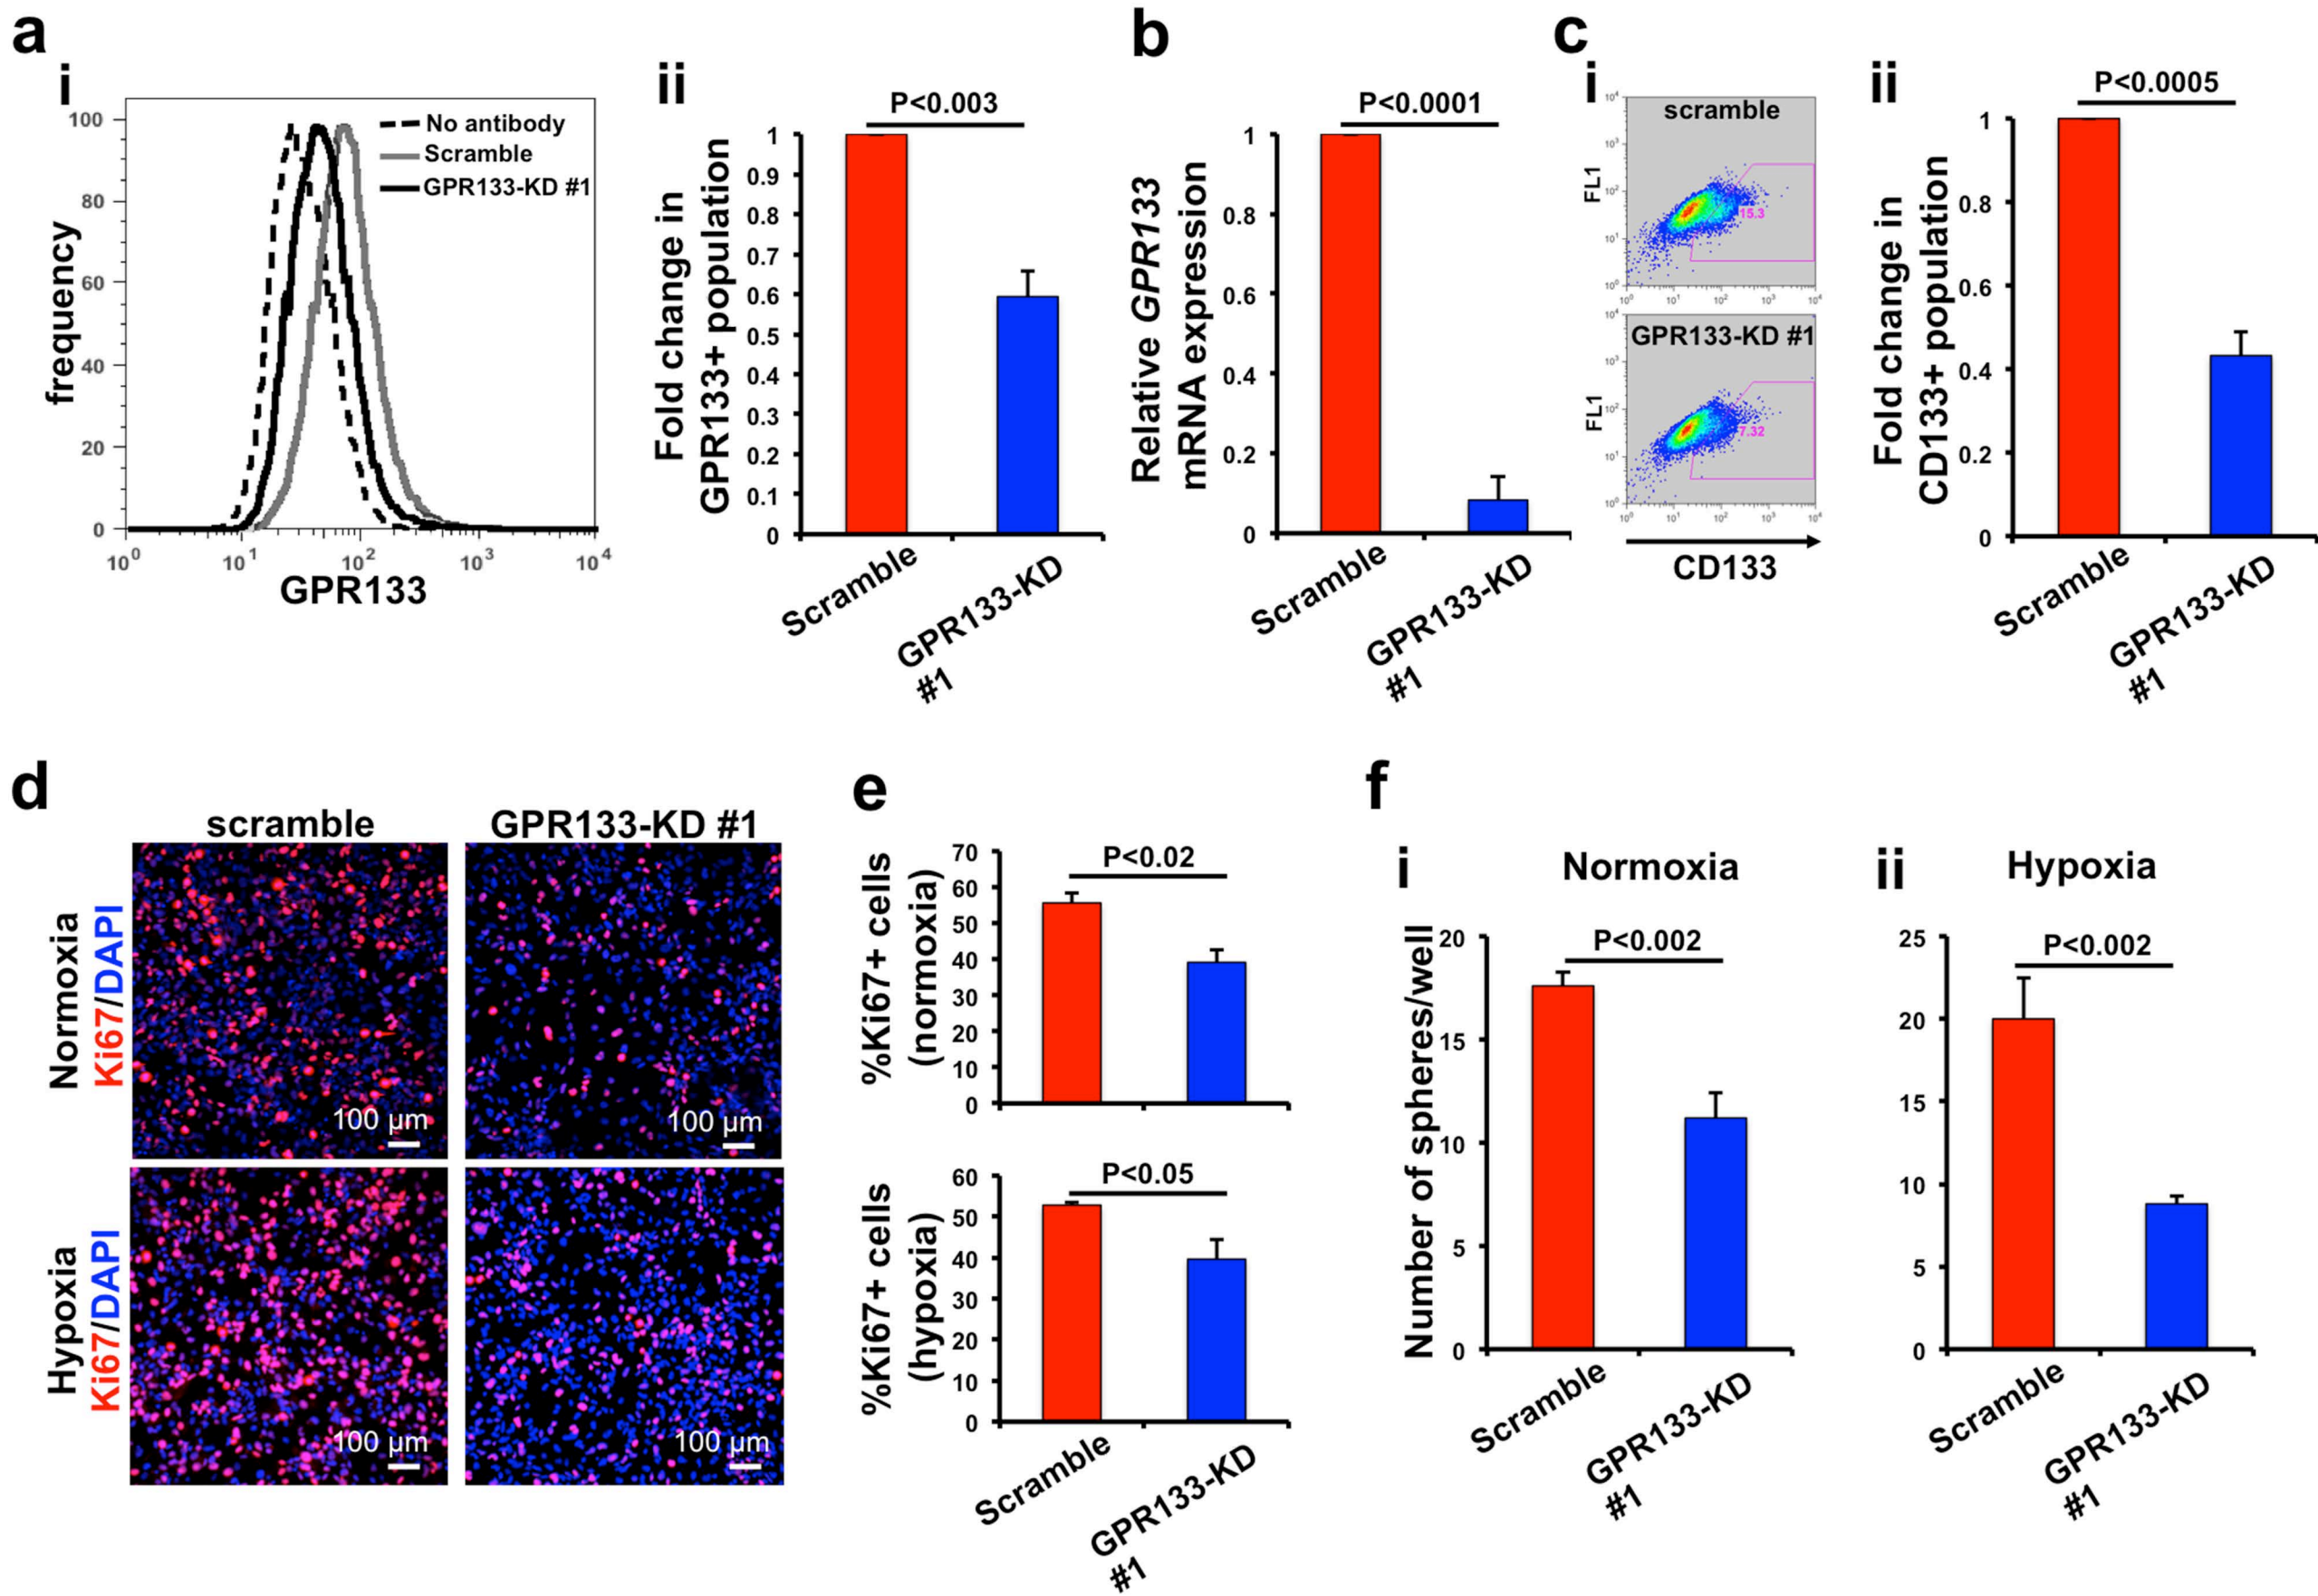

# Supplementary Figure 7

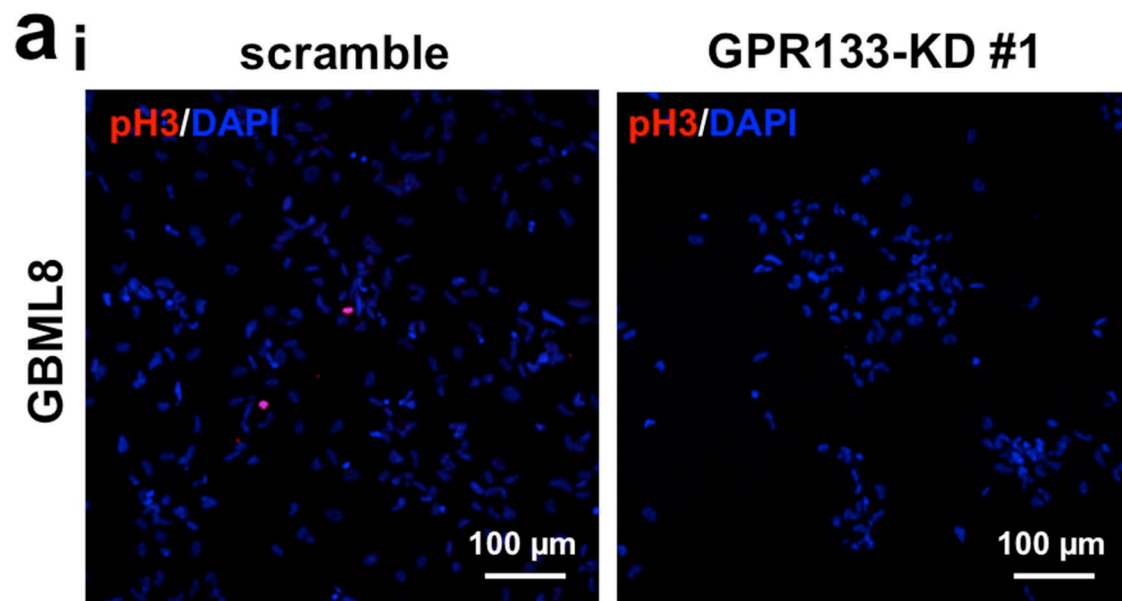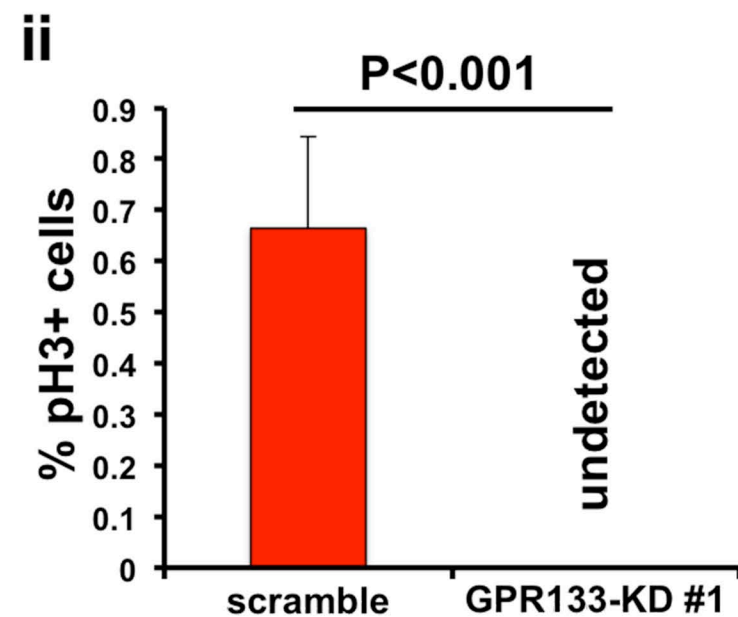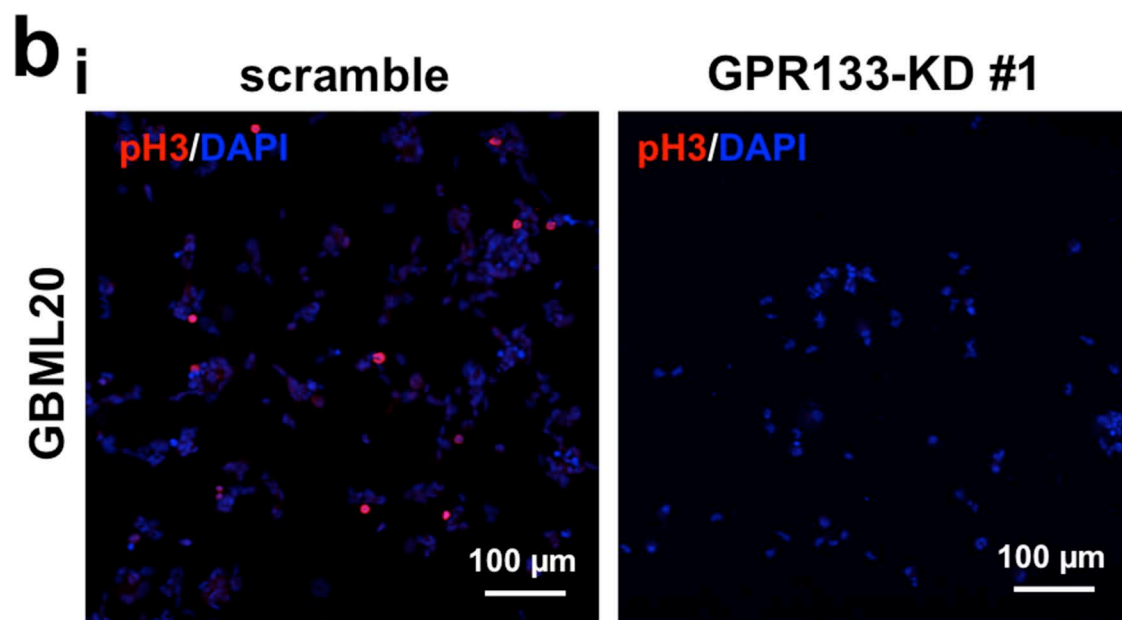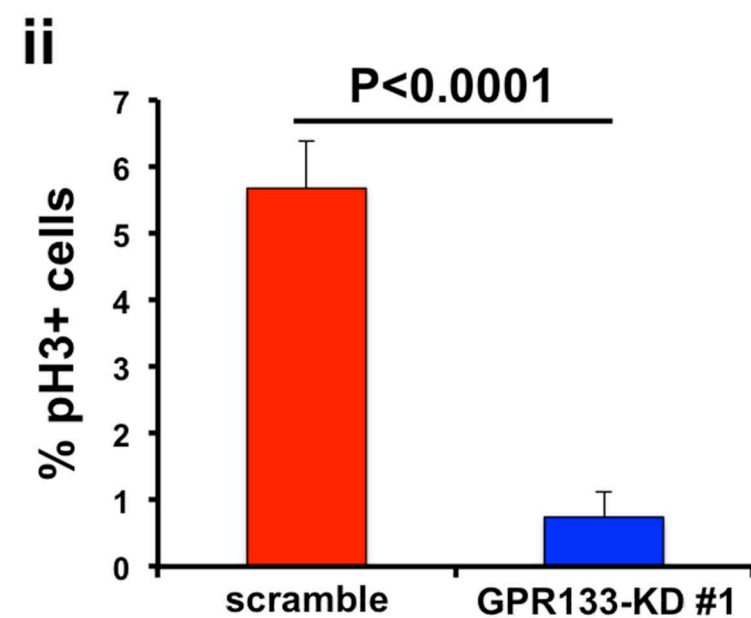

# Supplementary Figure 8

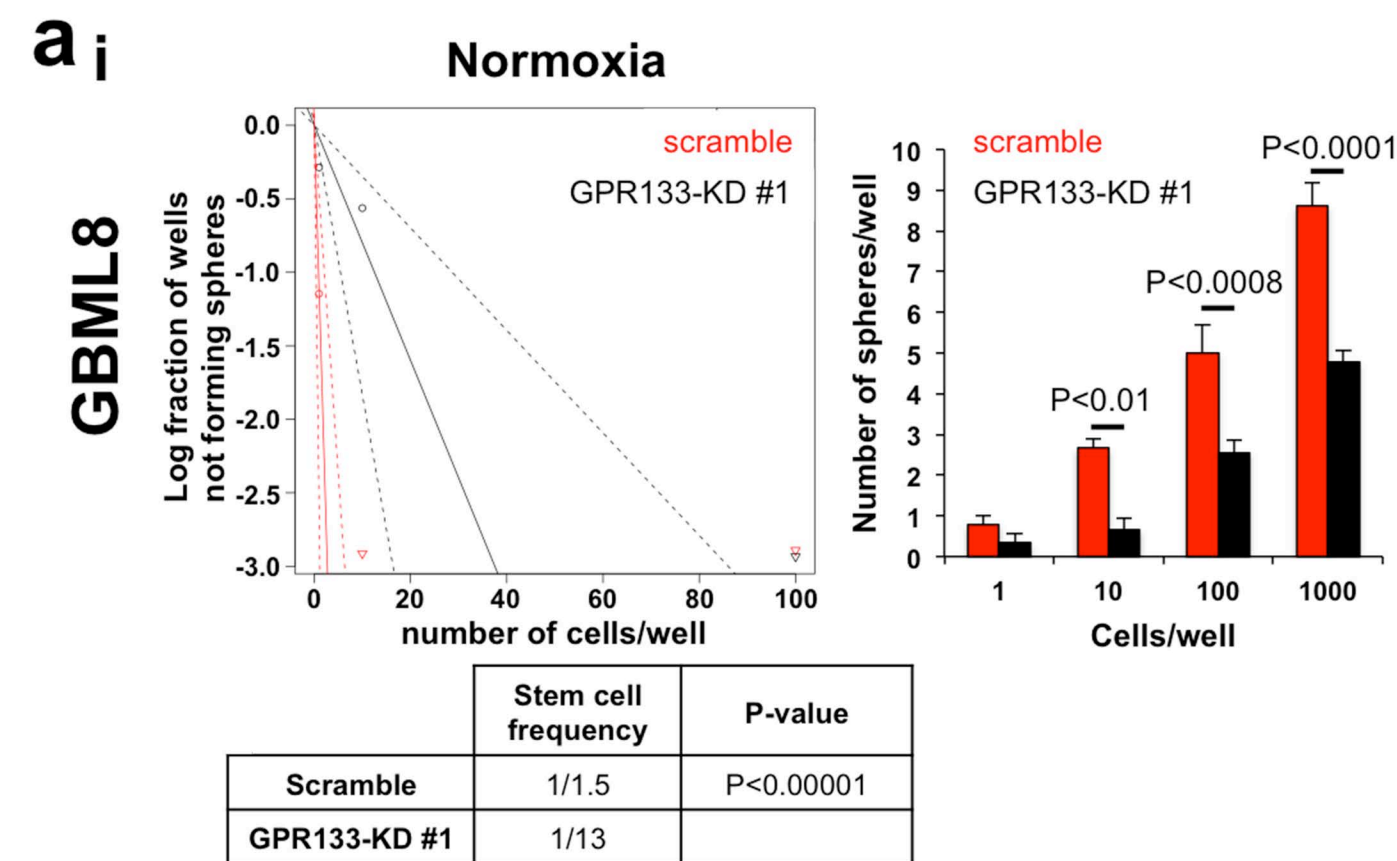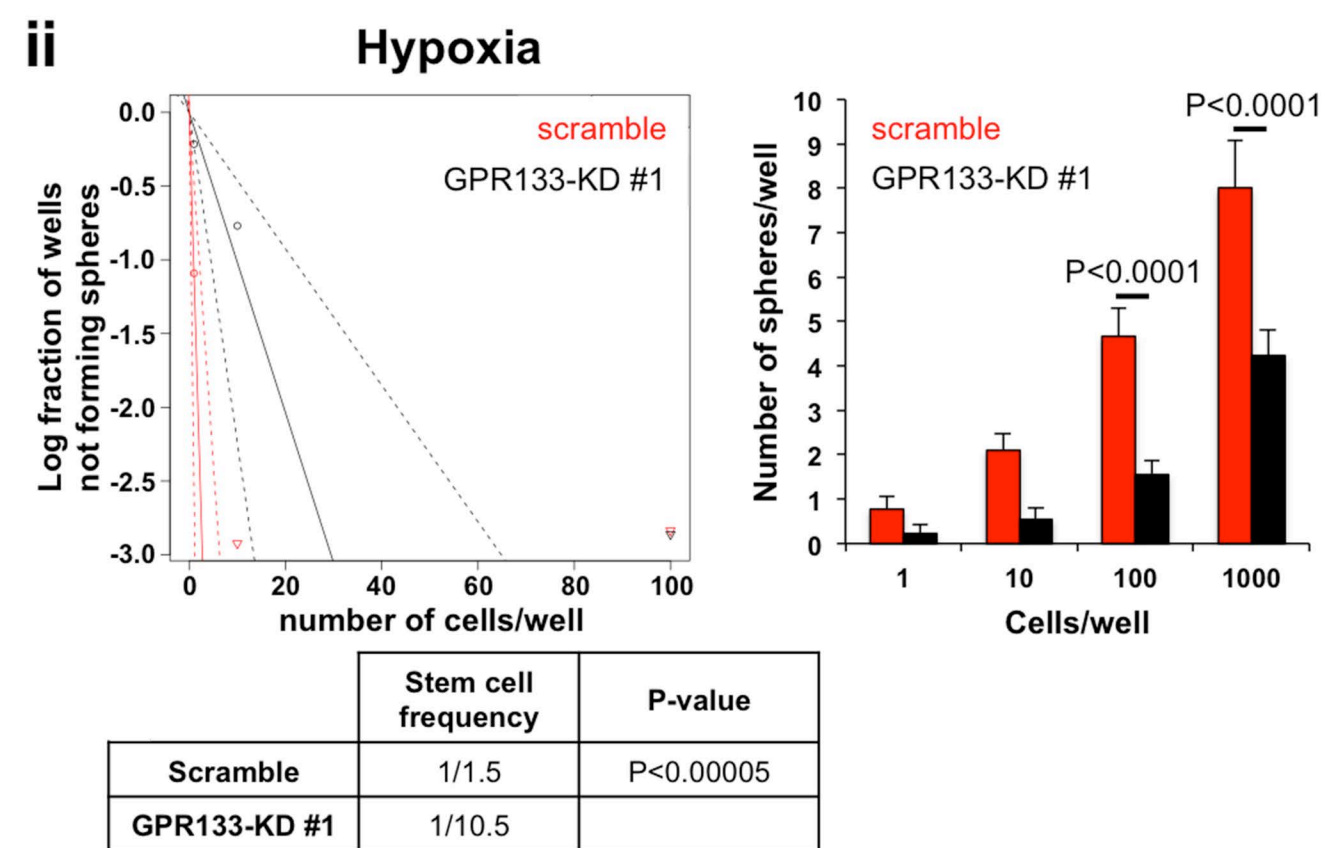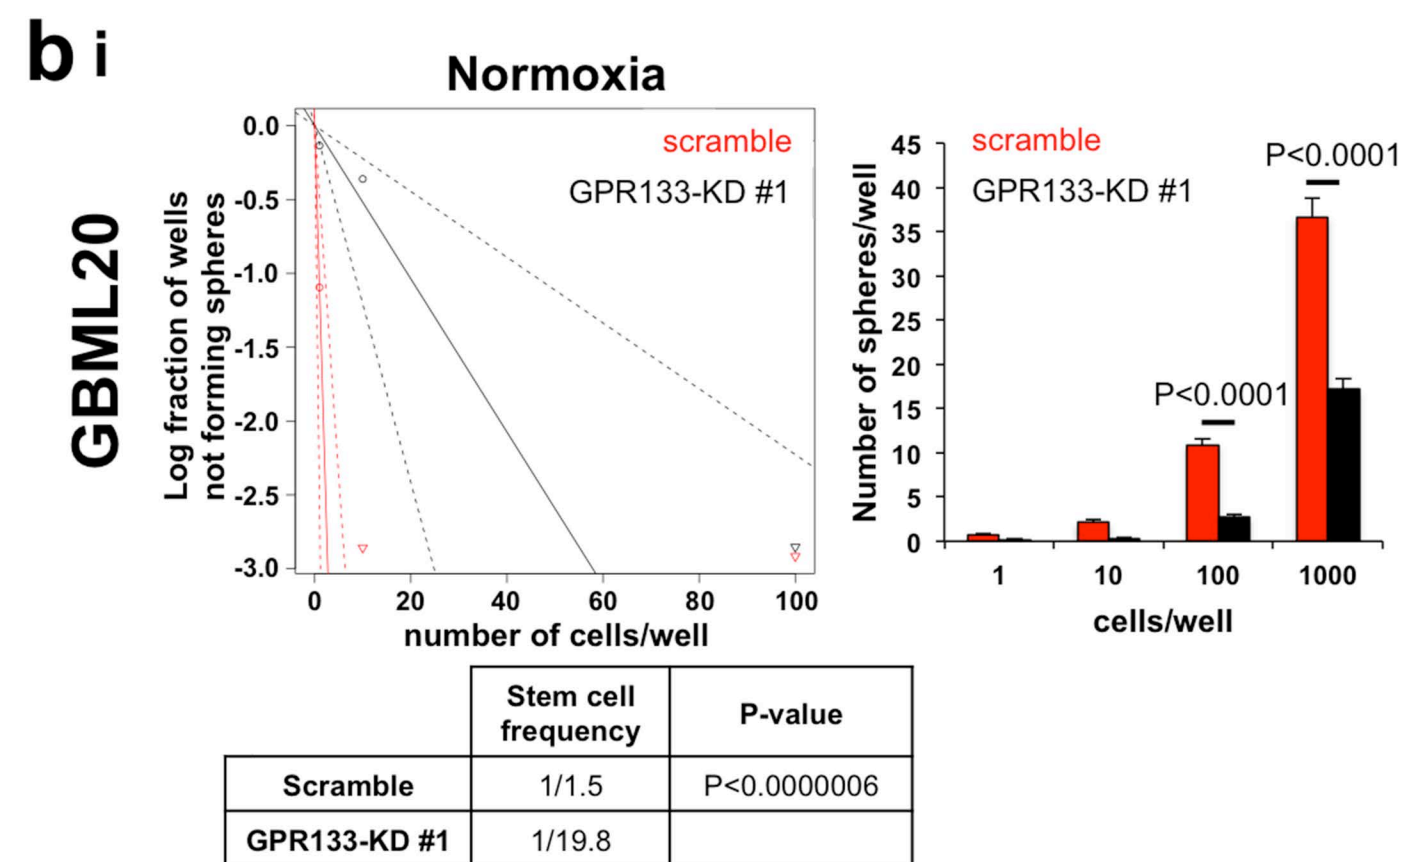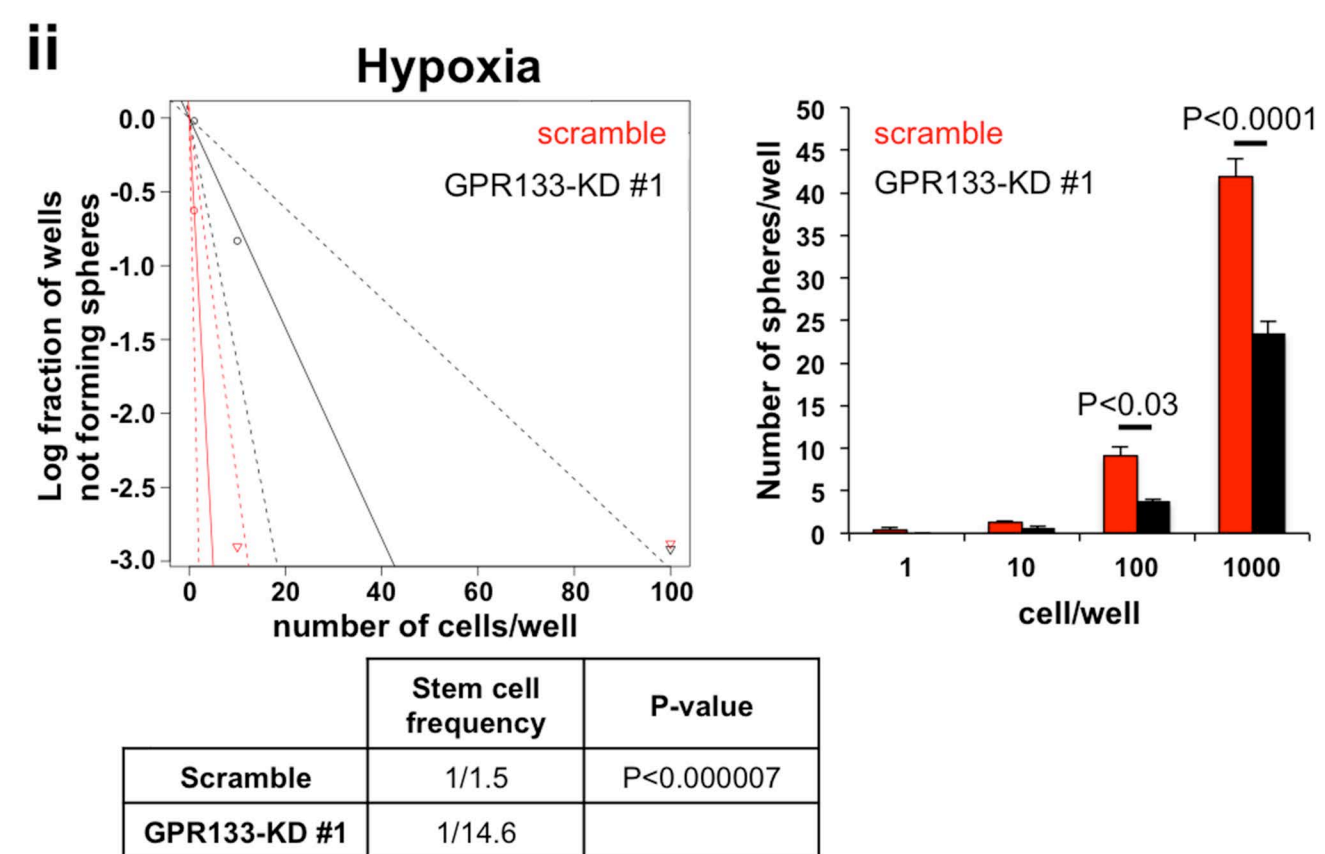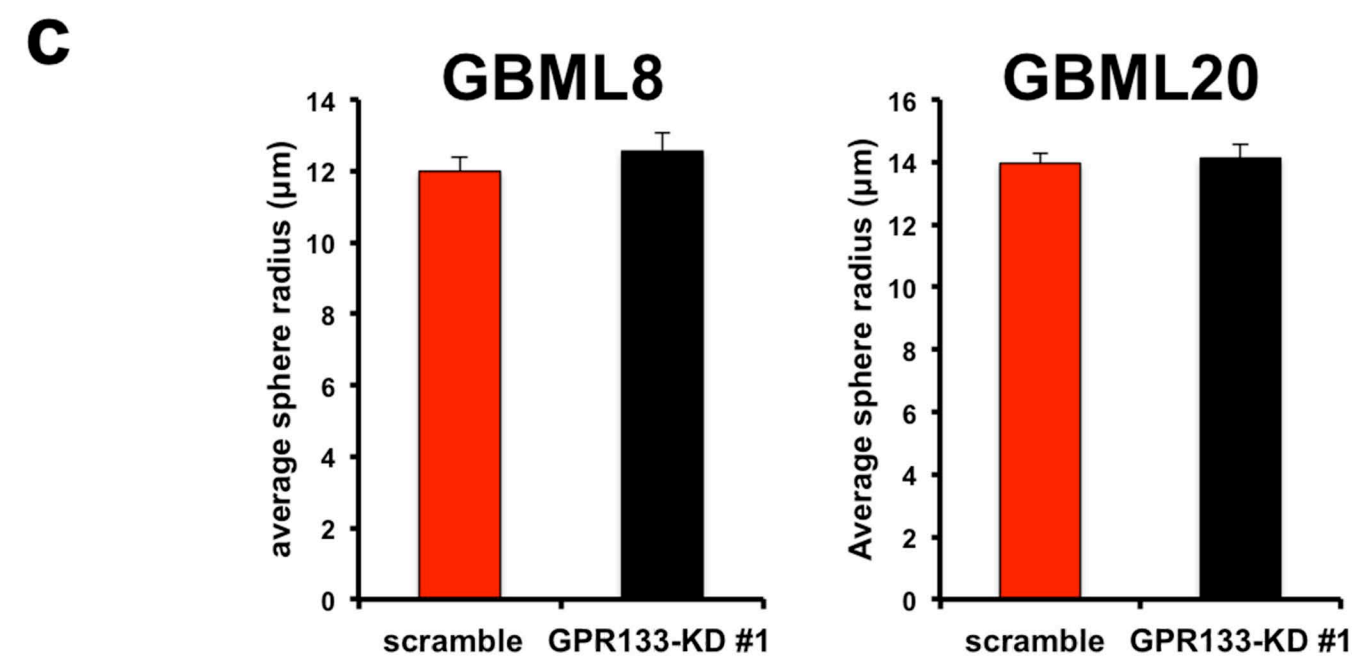

**Supplementary Table 1a:** Genes upregulated in CD133+ vs. CD133- GBM cells

| <b>gene</b>      | <b>log2 change</b> | <b>fold change</b> | <b>FDR-adjusted p value</b> |
|------------------|--------------------|--------------------|-----------------------------|
| <i>PROM1</i>     | 4.02359            | 16.26377211        | 0.004                       |
| <i>ACAN</i>      | 3.77966            | 13.73380995        | 0.004                       |
| <i>IGSF21</i>    | 3.6893             | 12.90000751        | 0.004                       |
| <i>ALPK2</i>     | 3.50818            | 11.37803879        | 0.025                       |
| <i>FAM180A</i>   | 3.4572             | 10.98299791        | 0.004                       |
| <i>SORCS3</i>    | 3.37402            | 10.36767145        | 0.004                       |
| <i>ANO1</i>      | 3.17698            | 9.044119158        | 0.004                       |
| <i>NPTX1</i>     | 3.15352            | 8.898239933        | 0.004                       |
| <i>ESPN</i>      | 3.15049            | 8.879571141        | 0.016                       |
| <i>CA9</i>       | 3.07609            | 8.433257464        | 0.004                       |
| <i>GPR133</i>    | 3.0061             | 8.033897194        | 0.004                       |
| <i>FAM150B</i>   | 2.98885            | 7.938409582        | 0.004                       |
| <i>SPNS2</i>     | 2.94832            | 7.718497304        | 0.004                       |
| <i>DHRS3</i>     | 2.92511            | 7.595316059        | 0.047                       |
| <i>SLC6A6</i>    | 2.89976            | 7.463022316        | 0.004                       |
| <i>NRXN3</i>     | 2.82332            | 7.077893236        | 0.004                       |
| <i>EDN2</i>      | 2.67708            | 6.39560128         | 0.007                       |
| <i>ADCY8</i>     | 2.56274            | 5.908287377        | 0.004                       |
| <i>RHBDF2</i>    | 2.55968            | 5.895769001        | 0.004                       |
| <i>PCDH8</i>     | 2.46046            | 5.503921906        | 0.004                       |
| <i>SHANK2</i>    | 2.45849            | 5.49641143         | 0.004                       |
| <i>GRIP2</i>     | 2.30228            | 4.932366489        | 0.004                       |
| <i>CHI3L1</i>    | 2.25978            | 4.789184449        | 0.045                       |
| <i>GMPR</i>      | 2.24373            | 4.736199986        | 0.004                       |
| <i>HAPLN3</i>    | 2.21446            | 4.641078179        | 0.004                       |
| <i>SORCS2</i>    | 2.17459            | 4.514574438        | 0.004                       |
| <i>LOC154761</i> | 2.11182            | 4.322362289        | 0.004                       |
| <i>TPPP3</i>     | 2.10823            | 4.3116199          | 0.004                       |
| <i>SPAG4</i>     | 2.10036            | 4.288163755        | 0.007                       |
| <i>COL15A1</i>   | 2.09563            | 4.274127662        | 0.004                       |
| <i>LOXL2</i>     | 2.08287            | 4.236491575        | 0.004                       |
| <i>SLC14A1</i>   | 2.08245            | 4.235258419        | 0.004                       |
| <i>CAV1</i>      | 2.05299            | 4.149650983        | 0.004                       |
| <i>CDH5</i>      | 2.05091            | 4.14367255         | 0.004                       |
| <i>PRSS35</i>    | 2.04238            | 4.119245183        | 0.036                       |
| <i>MMP17</i>     | 2.03999            | 4.112426801        | 0.004                       |
| <i>HIC1</i>      | 2.0392             | 4.110175509        | 0.023                       |
| <i>MAP7D2</i>    | 2.02911            | 4.081529826        | 0.004                       |

|                  |         |             |       |
|------------------|---------|-------------|-------|
| <i>LMO1</i>      | 2.0216  | 4.060338483 | 0.004 |
| <i>SMAD7</i>     | 2.00634 | 4.017616893 | 0.004 |
| <i>ESRRB</i>     | 1.999   | 3.997228372 | 0.016 |
| <i>MT1E</i>      | 1.99553 | 3.987625708 | 0.018 |
| <i>C1QTNF5</i>   | 1.99517 | 3.986630788 | 0.007 |
| <i>OLFM1</i>     | 1.98693 | 3.963925918 | 0.004 |
| <i>TNFAIP2</i>   | 1.98364 | 3.954896665 | 0.048 |
| <i>EDN1</i>      | 1.98353 | 3.954595131 | 0.011 |
| <i>LOC284578</i> | 1.98208 | 3.950622509 | 0.007 |
| <i>GABRG3</i>    | 1.98182 | 3.949910599 | 0.018 |
| <i>NELL2</i>     | 1.97029 | 3.918468773 | 0.004 |
| <i>FAM50B</i>    | 1.95733 | 3.883426067 | 0.034 |
| <i>OLFML2A</i>   | 1.9427  | 3.844244242 | 0.004 |
| <i>AQP1</i>      | 1.93211 | 3.816129156 | 0.023 |
| <i>H1FO</i>      | 1.92254 | 3.790898948 | 0.004 |
| <i>NDRG1</i>     | 1.91194 | 3.763147922 | 0.004 |
| <i>APLN</i>      | 1.8974  | 3.72541204  | 0.004 |
| <i>ELFN1</i>     | 1.89274 | 3.713398127 | 0.013 |
| <i>WNT7A</i>     | 1.86552 | 3.643992526 | 0.004 |
| <i>STC1</i>      | 1.84502 | 3.592579295 | 0.004 |
| <i>NXPH4</i>     | 1.84486 | 3.592180887 | 0.004 |
| <i>CDH7</i>      | 1.84446 | 3.591185061 | 0.018 |
| <i>MYO1B</i>     | 1.83421 | 3.565760981 | 0.004 |
| <i>OGDHL</i>     | 1.81885 | 3.527998628 | 0.004 |
| <i>MAP3K5</i>    | 1.80557 | 3.49567243  | 0.004 |
| <i>SNCB</i>      | 1.78044 | 3.435309303 | 0.004 |
| <i>DUSP26</i>    | 1.7681  | 3.406050912 | 0.039 |
| <i>SERPINF1</i>  | 1.75522 | 3.375777926 | 0.007 |
| <i>OPCML</i>     | 1.74628 | 3.354923802 | 0.004 |
| <i>PCSK1</i>     | 1.7144  | 3.281601372 | 0.004 |
| <i>KCNK3</i>     | 1.71425 | 3.281260195 | 0.018 |
| <i>SELM</i>      | 1.71122 | 3.274376006 | 0.025 |
| <i>DDIT4L</i>    | 1.69559 | 3.239093245 | 0.004 |
| <i>AMPD3</i>     | 1.67555 | 3.194411122 | 0.004 |
| <i>INHBB</i>     | 1.67535 | 3.193968313 | 0.004 |
| <i>CEBPD</i>     | 1.67203 | 3.186626648 | 0.004 |
| <i>CDK18</i>     | 1.66736 | 3.176328224 | 0.004 |
| <i>ADM</i>       | 1.65296 | 3.144781975 | 0.004 |
| <i>WNT7B</i>     | 1.64147 | 3.119835582 | 0.004 |
| <i>CYB5R2</i>    | 1.63011 | 3.095365988 | 0.023 |
| <i>GALNTL4</i>   | 1.625   | 3.084421651 | 0.004 |

|                  |         |             |       |
|------------------|---------|-------------|-------|
| <i>ADAMTS7</i>   | 1.6153  | 3.063753017 | 0.013 |
| <i>LGALS3</i>    | 1.61346 | 3.059848026 | 0.004 |
| <i>SIK1</i>      | 1.60679 | 3.045734107 | 0.004 |
| <i>FOSL2</i>     | 1.60012 | 3.031685291 | 0.004 |
| <i>CAPG</i>      | 1.5931  | 3.016969266 | 0.004 |
| <i>SGIP1</i>     | 1.58736 | 3.004989604 | 0.004 |
| <i>NRP1</i>      | 1.57982 | 2.989325506 | 0.004 |
| <i>ACCS</i>      | 1.57952 | 2.988703958 | 0.021 |
| <i>MRVI1</i>     | 1.5783  | 2.98617766  | 0.004 |
| <i>KBTBD11</i>   | 1.57501 | 2.979375578 | 0.004 |
| <i>SLC16A3</i>   | 1.573   | 2.975227525 | 0.004 |
| <i>CRABP2</i>    | 1.5722  | 2.973578166 | 0.004 |
| <i>HSF4</i>      | 1.5596  | 2.947721039 | 0.004 |
| <i>AKAP12</i>    | 1.55173 | 2.931684799 | 0.004 |
| <i>COL23A1</i>   | 1.54094 | 2.909840348 | 0.032 |
| <i>HSD11B2</i>   | 1.54088 | 2.909719334 | 0.039 |
| <i>CNGA3</i>     | 1.53308 | 2.894030246 | 0.013 |
| <i>BAMBI</i>     | 1.52091 | 2.869720041 | 0.039 |
| <i>ALDOC</i>     | 1.51809 | 2.86411615  | 0.004 |
| <i>VWA1</i>      | 1.47682 | 2.783345494 | 0.011 |
| <i>EGLN3</i>     | 1.47663 | 2.782978957 | 0.004 |
| <i>CHST15</i>    | 1.47479 | 2.779431834 | 0.021 |
| <i>MFSD4</i>     | 1.47137 | 2.772850818 | 0.007 |
| <i>PYGL</i>      | 1.47036 | 2.770910283 | 0.004 |
| <i>PDZD2</i>     | 1.46249 | 2.755835932 | 0.004 |
| <i>IL17RC</i>    | 1.46152 | 2.753983661 | 0.045 |
| <i>ITPR1</i>     | 1.44994 | 2.731966892 | 0.004 |
| <i>CLIC6</i>     | 1.43228 | 2.69872879  | 0.038 |
| <i>RNF182</i>    | 1.42411 | 2.683489048 | 0.004 |
| <i>GSN</i>       | 1.41736 | 2.670963017 | 0.004 |
| <i>EFR3B</i>     | 1.41381 | 2.664398731 | 0.004 |
| <i>ADSSL1</i>    | 1.40184 | 2.642383745 | 0.004 |
| <i>INSIG2</i>    | 1.39879 | 2.636803386 | 0.004 |
| <i>S1PR3</i>     | 1.39323 | 2.62666097  | 0.004 |
| <i>TCEAL5</i>    | 1.39179 | 2.624040524 | 0.007 |
| <i>CA12</i>      | 1.38766 | 2.61653943  | 0.004 |
| <i>EPB49</i>     | 1.36479 | 2.575388356 | 0.034 |
| <i>MLLT4-AS1</i> | 1.36347 | 2.573033071 | 0.021 |
| <i>FAM69C</i>    | 1.36208 | 2.570555213 | 0.021 |
| <i>TF</i>        | 1.34861 | 2.546666424 | 0.030 |
| <i>BHLHE40</i>   | 1.34337 | 2.537433477 | 0.004 |



|                     |         |             |       |
|---------------------|---------|-------------|-------|
| <i>PPFIA4</i>       | 1.34201 | 2.535042616 | 0.004 |
| <i>FAM110C</i>      | 1.3388  | 2.52940841  | 0.047 |
| <i>BEST3</i>        | 1.33022 | 2.514410148 | 0.004 |
| <i>MIAT</i>         | 1.31799 | 2.493185107 | 0.004 |
| <i>NT5E</i>         | 1.3026  | 2.466730322 | 0.004 |
| <i>FAM115C</i>      | 1.29649 | 2.456305491 | 0.004 |
| <i>FGF11</i>        | 1.2949  | 2.453599878 | 0.038 |
| <i>OBSL1</i>        | 1.29456 | 2.453021706 | 0.004 |
| <i>ELL2</i>         | 1.28918 | 2.4438911   | 0.004 |
| <i>TMEM123</i>      | 1.2846  | 2.436144991 | 0.004 |
| <i>ZNF395</i>       | 1.28442 | 2.435841061 | 0.004 |
| <i>PCOLCE2</i>      | 1.28285 | 2.43319172  | 0.007 |
| <i>ID2</i>          | 1.27942 | 2.427413691 | 0.004 |
| <i>SLC2A1</i>       | 1.2714  | 2.413957038 | 0.004 |
| <i>STAC2</i>        | 1.26583 | 2.404655129 | 0.004 |
| <i>LOC100216479</i> | 1.26444 | 2.40233942  | 0.004 |
| <i>GPR12</i>        | 1.26042 | 2.395654735 | 0.004 |
| <i>PFKFB4</i>       | 1.24961 | 2.377771366 | 0.004 |
| <i>HSPB6</i>        | 1.24708 | 2.373605212 | 0.004 |
| <i>RCOR2</i>        | 1.2457  | 2.371335842 | 0.004 |
| <i>MAF</i>          | 1.24142 | 2.364311296 | 0.004 |
| <i>GATM</i>         | 1.23682 | 2.35678475  | 0.004 |
| <i>ZNF334</i>       | 1.23033 | 2.346206505 | 0.023 |
| <i>STC2</i>         | 1.21213 | 2.316794367 | 0.004 |
| <i>NTRK2</i>        | 1.20587 | 2.30676334  | 0.004 |
| <i>SLC43A3</i>      | 1.20298 | 2.302147068 | 0.004 |
| <i>EHD2</i>         | 1.19712 | 2.292815075 | 0.004 |
| <i>SH2D4A</i>       | 1.19615 | 2.291274012 | 0.016 |
| <i>IGFBP5</i>       | 1.19567 | 2.290511808 | 0.004 |
| <i>GYPC</i>         | 1.19441 | 2.288512227 | 0.007 |
| <i>FAM49A</i>       | 1.19233 | 2.285215151 | 0.004 |
| <i>MGST1</i>        | 1.18968 | 2.281021429 | 0.045 |
| <i>HILPDA</i>       | 1.18768 | 2.277861453 | 0.004 |
| <i>PTPRD</i>        | 1.17923 | 2.2645588   | 0.004 |
| <i>SEMA5B</i>       | 1.17591 | 2.259353479 | 0.016 |
| <i>SLC2A3</i>       | 1.16547 | 2.24306278  | 0.004 |
| <i>LMO2</i>         | 1.16336 | 2.239784608 | 0.018 |
| <i>NRN1</i>         | 1.14803 | 2.216110778 | 0.004 |
| <i>YWHAH</i>        | 1.13928 | 2.202710659 | 0.004 |
| <i>EMP2</i>         | 1.13889 | 2.202115287 | 0.004 |
| <i>GABBR2</i>       | 1.13096 | 2.19004422  | 0.004 |

|                  |          |             |       |
|------------------|----------|-------------|-------|
| <i>ARHGEF3</i>   | 1.12941  | 2.187692548 | 0.004 |
| <i>CNR1</i>      | 1.12917  | 2.187328644 | 0.004 |
| <i>SFXN3</i>     | 1.12198  | 2.176454711 | 0.007 |
| <i>KIAA1671</i>  | 1.11606  | 2.167542077 | 0.004 |
| <i>TSC22D3</i>   | 1.11344  | 2.163609294 | 0.004 |
| <i>MAFB</i>      | 1.11026  | 2.158845501 | 0.034 |
| <i>EFS</i>       | 1.10827  | 2.155869723 | 0.004 |
| <i>CD9</i>       | 1.10732  | 2.154450572 | 0.004 |
| <i>PSTPIP2</i>   | 1.09879  | 2.141749869 | 0.045 |
| <i>LOC254559</i> | 1.09859  | 2.14145298  | 0.030 |
| <i>PPP1R3C</i>   | 1.0874   | 2.124907441 | 0.004 |
| <i>ST3GAL1</i>   | 1.08427  | 2.120302344 | 0.004 |
| <i>PRPH</i>      | 1.08074  | 2.115120709 | 0.043 |
| <i>FABP5</i>     | 1.07707  | 2.109746997 | 0.004 |
| <i>PLOD2</i>     | 1.06946  | 2.098647697 | 0.004 |
| <i>RARA</i>      | 1.05355  | 2.075631017 | 0.030 |
| <i>TRIM2</i>     | 1.04904  | 2.069152531 | 0.004 |
| <i>MED15</i>     | 1.04897  | 2.069052138 | 0.004 |
| <i>CD97</i>      | 1.04399  | 2.061922345 | 0.004 |
| <i>FKBP9L</i>    | 1.03953  | 2.055557886 | 0.036 |
| <i>HK2</i>       | 1.03389  | 2.047537678 | 0.004 |
| <i>PDK1</i>      | 1.03177  | 2.044531088 | 0.004 |
| <i>NFATC4</i>    | 1.02656  | 2.037160995 | 0.013 |
| <i>TET1</i>      | 1.02306  | 2.032224802 | 0.011 |
| <i>SPEG</i>      | 1.01486  | 2.020706793 | 0.028 |
| <i>MEST</i>      | 1.00816  | 2.011344214 | 0.004 |
| <i>PPAP2B</i>    | 1.00257  | 2.003565952 | 0.004 |
| <i>MT1X</i>      | 1.00088  | 2.001220311 | 0.038 |
| <i>EPAS1</i>     | 0.995335 | 1.993543381 | 0.004 |
| <i>ENO2</i>      | 0.993995 | 1.991692603 | 0.004 |
| <i>TMEM45A</i>   | 0.991327 | 1.988012737 | 0.007 |
| <i>B3GALNT1</i>  | 0.98677  | 1.981743164 | 0.004 |
| <i>CHPF</i>      | 0.983777 | 1.977636122 | 0.004 |
| <i>LINGO1</i>    | 0.983445 | 1.977181071 | 0.004 |
| <i>CSPG4</i>     | 0.98313  | 1.976749418 | 0.011 |
| <i>GRIK1</i>     | 0.978111 | 1.969884442 | 0.004 |
| <i>TGFA</i>      | 0.976867 | 1.968186591 | 0.004 |
| <i>SIPA1L2</i>   | 0.975836 | 1.966780559 | 0.004 |
| <i>FLNB</i>      | 0.968271 | 1.956494426 | 0.018 |
| <i>CD109</i>     | 0.964911 | 1.951943102 | 0.023 |
| <i>LRRC49</i>    | 0.961732 | 1.947646702 | 0.007 |

|                   |          |             |       |
|-------------------|----------|-------------|-------|
| <i>MLLT3</i>      | 0.955775 | 1.939621297 | 0.034 |
| <i>VEGFA</i>      | 0.955466 | 1.939205909 | 0.004 |
| <i>MXI1</i>       | 0.938912 | 1.917081937 | 0.004 |
| <i>MIR210HG</i>   | 0.935642 | 1.912741617 | 0.039 |
| <i>ZFP36L2</i>    | 0.932293 | 1.908306624 | 0.004 |
| <i>SYTL2</i>      | 0.930037 | 1.90532486  | 0.004 |
| <i>LGR6</i>       | 0.926289 | 1.900381411 | 0.034 |
| <i>TMEM198</i>    | 0.925968 | 1.899958623 | 0.043 |
| <i>MDK</i>        | 0.9257   | 1.899605713 | 0.004 |
| <i>APOLD1</i>     | 0.918636 | 1.890327233 | 0.004 |
| <i>FLJ46906</i>   | 0.9126   | 1.882434935 | 0.007 |
| <i>RND3</i>       | 0.912391 | 1.882162251 | 0.045 |
| <i>KCNE4</i>      | 0.911253 | 1.880678184 | 0.004 |
| <i>SORL1</i>      | 0.904571 | 1.871987758 | 0.004 |
| <i>SCARB1</i>     | 0.902987 | 1.869933546 | 0.011 |
| <i>NPNT</i>       | 0.902121 | 1.868811426 | 0.013 |
| <i>FKBP9</i>      | 0.899069 | 1.864862162 | 0.004 |
| <i>NT5C3</i>      | 0.896159 | 1.861104417 | 0.004 |
| <i>PDE4D</i>      | 0.894443 | 1.85889206  | 0.032 |
| <i>C1orf198</i>   | 0.885987 | 1.848028492 | 0.004 |
| <i>PPARGC1B</i>   | 0.885446 | 1.847335625 | 0.004 |
| <i>FGFR1</i>      | 0.869414 | 1.826920683 | 0.004 |
| <i>CABIN1</i>     | 0.863656 | 1.819643716 | 0.013 |
| <i>ERO1L</i>      | 0.858669 | 1.813364567 | 0.018 |
| <i>MEG3</i>       | 0.858232 | 1.812815372 | 0.023 |
| <i>IFITM3</i>     | 0.857451 | 1.811834274 | 0.028 |
| <i>LOC730101</i>  | 0.855987 | 1.809996616 | 0.043 |
| <i>FRAS1</i>      | 0.848884 | 1.801107136 | 0.004 |
| <i>AMD1</i>       | 0.846678 | 1.798355199 | 0.004 |
| <i>TMEM22</i>     | 0.843261 | 1.794100863 | 0.025 |
| <i>RORA</i>       | 0.843026 | 1.793808647 | 0.013 |
| <i>MT3</i>        | 0.842154 | 1.792724753 | 0.004 |
| <i>SBF2</i>       | 0.841085 | 1.791396882 | 0.004 |
| <i>ARL4C</i>      | 0.84046  | 1.790620986 | 0.004 |
| <i>IQSEC1</i>     | 0.839238 | 1.789104926 | 0.032 |
| <i>HJURP</i>      | 0.836282 | 1.785442905 | 0.013 |
| <i>C11orf41</i>   | 0.829182 | 1.77667771  | 0.023 |
| <i>EYA2</i>       | 0.828153 | 1.77541095  | 0.025 |
| <i>NOTCH3</i>     | 0.826995 | 1.773986462 | 0.013 |
| <i>KATNAL1</i>    | 0.826141 | 1.772936666 | 0.018 |
| <i>CSGALNACT1</i> | 0.819128 | 1.764339261 | 0.011 |

|                 |          |             |       |
|-----------------|----------|-------------|-------|
| <i>PSMD5</i>    | 0.814537 | 1.758733636 | 0.021 |
| <i>S1PR2</i>    | 0.814434 | 1.758608077 | 0.050 |
| <i>JAM2</i>     | 0.8112   | 1.75467033  | 0.032 |
| <i>RP9P</i>     | 0.80781  | 1.7505521   | 0.030 |
| <i>CXCR4</i>    | 0.806631 | 1.749122097 | 0.025 |
| <i>VOPP1</i>    | 0.796003 | 1.736284066 | 0.007 |
| <i>NCALD</i>    | 0.794744 | 1.73476952  | 0.011 |
| <i>CAV2</i>     | 0.78674  | 1.725171754 | 0.021 |
| <i>C14orf43</i> | 0.785832 | 1.724086311 | 0.016 |
| <i>NEDD4L</i>   | 0.783422 | 1.721208655 | 0.023 |
| <i>GRB10</i>    | 0.782665 | 1.720305752 | 0.007 |
| <i>TNIP1</i>    | 0.773008 | 1.708828958 | 0.023 |
| <i>TSKU</i>     | 0.771003 | 1.706455745 | 0.043 |
| <i>AK4</i>      | 0.758256 | 1.691444688 | 0.004 |
| <i>PPFIBP2</i>  | 0.754097 | 1.686575614 | 0.023 |
| <i>LPL</i>      | 0.75126  | 1.683262292 | 0.016 |
| <i>CCNG2</i>    | 0.74887  | 1.680476071 | 0.045 |
| <i>FEM1C</i>    | 0.737755 | 1.667578874 | 0.039 |
| <i>DDIT4</i>    | 0.711344 | 1.637328726 | 0.036 |
| <i>PSPH</i>     | 0.702172 | 1.626952352 | 0.016 |
| <i>C5orf62</i>  | 0.687785 | 1.610808511 | 0.038 |
| <i>BNIP3L</i>   | 0.662611 | 1.582944858 | 0.043 |
| <i>ARHGAP21</i> | 0.660533 | 1.580666489 | 0.045 |

**Supplementary Table 1b:** Genes downregulated in CD133+ vs. CD133- GBM cells

| gene     | log2 change | fold change | FDR-adjusted p value |
|----------|-------------|-------------|----------------------|
| KCNJ6    | 2.82636     | 7.092823266 | 0.004                |
| LRRN1    | 2.40211     | 5.285756626 | 0.004                |
| ID3      | 2.35582     | 5.118850954 | 0.004                |
| IL33     | 2.2916      | 4.895987925 | 0.011                |
| SCRG1    | 1.97385     | 3.928149942 | 0.004                |
| NEUROD1  | 1.86324     | 3.638238197 | 0.004                |
| ID1      | 1.75405     | 3.37304134  | 0.004                |
| ST6GAL1  | 1.67493     | 3.193038614 | 0.004                |
| SPP1     | 1.5431      | 2.914200218 | 0.004                |
| SNCAIP   | 1.52535     | 2.87856542  | 0.011                |
| GRIK3    | 1.47713     | 2.783943631 | 0.004                |
| GPR126   | 1.39706     | 2.633643372 | 0.039                |
| EDNRB    | 1.39034     | 2.621404521 | 0.004                |
| DCC      | 1.38744     | 2.616140458 | 0.016                |
| HOPX     | 1.36608     | 2.577692195 | 0.013                |
| TMEM108  | 1.35151     | 2.551790695 | 0.004                |
| IQGAP2   | 1.29641     | 2.456169288 | 0.004                |
| TIMP3    | 1.26842     | 2.408975966 | 0.032                |
| KIAA1598 | 1.22756     | 2.341706069 | 0.004                |
| BCAN     | 1.22132     | 2.331599504 | 0.004                |
| PLAT     | 1.20322     | 2.302530074 | 0.004                |
| CDH6     | 1.19191     | 2.284549972 | 0.004                |
| POSTN    | 1.17074     | 2.251271415 | 0.004                |
| VGF      | 1.16919     | 2.248853998 | 0.004                |
| TNFRSF19 | 1.14168     | 2.206378035 | 0.004                |
| HSPA12A  | 1.07027     | 2.099826312 | 0.004                |
| SLC1A2   | 1.05194     | 2.073315973 | 0.007                |
| KCNQ2    | 1.03411     | 2.047849936 | 0.004                |
| CD24     | 1.01029     | 2.014315962 | 0.004                |
| LAMB1    | 0.957362    | 1.941756102 | 0.018                |
| FLRT3    | 0.944393    | 1.924379052 | 0.013                |
| PVRL3    | 0.937611    | 1.915353922 | 0.004                |
| BDNF     | 0.93551     | 1.912566618 | 0.041                |
| VCAN     | 0.903931    | 1.871157501 | 0.048                |
| SHROOM3  | 0.887019    | 1.849350912 | 0.013                |
| LRRC17   | 0.885076    | 1.84686191  | 0.041                |
| FST      | 0.884673    | 1.846346083 | 0.048                |
| RCAN1    | 0.873007    | 1.831476259 | 0.016                |

|         |          |             |       |
|---------|----------|-------------|-------|
| ANXA1   | 0.871862 | 1.830023278 | 0.004 |
| ODZ2    | 0.869303 | 1.826780127 | 0.016 |
| C8orf46 | 0.800004 | 1.741105954 | 0.048 |
| ALCAM   | 0.77189  | 1.707505233 | 0.034 |
| WISP1   | 0.754421 | 1.686954427 | 0.032 |
| EYA4    | 0.741246 | 1.671618928 | 0.023 |
| SACS    | 0.740583 | 1.670850901 | 0.021 |
| DLC1    | 0.725233 | 1.653167607 | 0.038 |
| COL5A2  | 0.719459 | 1.646564469 | 0.039 |
| SPRY4   | 0.708049 | 1.633593465 | 0.03  |

**Supplementary Table 2a.** Taqman Assays

| Target                    | TaqMan Assay  |
|---------------------------|---------------|
| <i>GPR133</i> -C-terminal | Hs00914797_m1 |
| <i>GPR133</i> -N-terminal | Hs00138665_m1 |
| <i>HPRT1</i>              | Hs28000695_m1 |
| <i>GAPDH</i>              | Hs02758991_m1 |
| <i>PROM1 (CD133)</i>      | Hs00195682_m1 |
| <i>HIF1A</i>              | Hs00153153_m1 |
| <i>18S</i>                | Hs99999901_s1 |

**Supplementary Table 2b.** PCR primers used in the study

| Target                           | Forward primer                         | Reverse primer                        | Amplicon (bp) |
|----------------------------------|----------------------------------------|---------------------------------------|---------------|
| <i>GPR133</i><br>(in CHO cells)  | 5'CCAGAGACAACAGCATGACC <sup>3'</sup>   | 5'TTTGGACTTCCAGGTGAACA <sup>3'</sup>  | 86            |
| <i>GPR133</i><br>promoter<br>HRE | 5'CTGTGTGTCCACGTGTATTTGG <sup>3'</sup> | 5'AGAAAAGAGTCAGCCCCTTCG <sup>3'</sup> | 90            |
| <i>CA9</i><br>promoter<br>HRE    | 5'GACTTTGGCTCCATCTCTGC <sup>3'</sup>   | 5'GTGTGTACGGGCTGTACGTG <sup>3'</sup>  | 133           |

**Supplementary Table 2c.** shRNA constructs

| shRNA construct         | Target sequence                        |
|-------------------------|----------------------------------------|
| <i>GPR133</i> target #1 | 5'CCTGCAGGGACTGTTTCATATT <sup>3'</sup> |
| <i>GPR133</i> target #2 | 5'GGAGTCACGCTTCTCTATTAC <sup>3'</sup>  |
| <i>HIF1A</i>            | 5'GCCGCTCAATTTATGAATATT <sup>3'</sup>  |
| <i>scramble</i>         | 5'CCTAAGGTTAAGTCGCCCTCG <sup>3'</sup>  |

**Supplementary Table 3.** Antibodies used for Immunofluorescence staining

| <b>Antigen</b>                      | <b>Company/Catalog #</b> | <b>Dilution</b>                    |
|-------------------------------------|--------------------------|------------------------------------|
| <b>GPR133 (polyclonal)</b>          | LSBio/ LS-A2034          | 1:200                              |
| <b>GPR133 (monoclonal)</b>          |                          | 1:1000 (1:5000 in CHO cell assays) |
| <b>CD133 (W6B3C1)</b>               | Miltenyi/130-092-395     | 1:50                               |
| <b>Ki67</b>                         | Abcam/ ab15580           | 1:200                              |
| <b>pH3</b>                          | EMD Millipore/06-570     | 1:1000                             |
| <b>Hif1<math>\alpha</math></b>      | Bethyl Labs/ A300-286A   | 1:200                              |
| <b>CA9</b>                          | Abcam/ ab15086           | 1:200                              |
| <b>Hydroxy-probe (pimonidazole)</b> | HydroxyProbe/ HP1-1000   | 1:100                              |
| <b>hNA</b>                          | Millipore/ MAB1281       | 1:200                              |
